# Supplementary material for: Binaphthol-based chiral host molecules for efficient solution-processed circularly polarized OLEDs
Source: Royal Society of Chemistry journal article supplement (doi:10.1039/d2cc06420k), 2023-01-01
Supplement: d2cc06420k1.pdf [file d2cc06420k1.pdf]

## Electronic Supplementary Information

### **Binaphthol-based Chiral Host Molecules for Efficient Solution-processed Circularly Polarized OLEDs**

Qiwei Dong<sup>a,b</sup>, Chen Xiao<sup>a,c</sup>, Binghong He<sup>a</sup>, Xuefeng Yang<sup>c</sup>, Songkun Zeng<sup>a</sup>, Qihang Zhong<sup>a</sup>, Pengfei Duan<sup>c</sup>, Weiguo Zhu<sup>a\*</sup>, Yafei Wang<sup>a\*</sup>

*<sup>a</sup>Jiangsu Collaborative Innovation Center of Photovoltaic Science and Engineering, Jiangsu Engineering Laboratory of Light-Electricity-Heat Energy-Converting Materials and Applications, School of Materials Science & Engineering, Changzhou University, Changzhou 213164, China.*

Email: W. Zhu: [zhuwg18@126.com](mailto:zhuwg18@126.com); Y. Wang: [qiji830404@hotmail.com](mailto:qiji830404@hotmail.com)

*<sup>b</sup>School of Materials Engineering, Changzhou Vocational Institute of Industry Technology, Changzhou 213164, China.*

*<sup>c</sup>CAS Center for Excellence in Nanoscience CAS Key Laboratory of Nano system and Hierarchical Fabrication National Center for Nanoscience and Technology (NCNST) Beijing 100190, P. R. China.*

## Contents

|          |                                                          |     |
|----------|----------------------------------------------------------|-----|
| <b>1</b> | <b>General information</b> .....                         | S1  |
| <b>2</b> | <b>Synthetic procedures and characterized data</b> ..... | S2  |
| <b>3</b> | <b>Thermal properties</b> .....                          | S19 |
| <b>4</b> | <b>Theoretical Calculations</b> .....                    | S19 |
| <b>5</b> | <b>Ultraviolet Photoelectron Spectroscopy</b> .....      | S20 |
| <b>6</b> | <b>Electrochemical properties</b> .....                  | S20 |
| <b>7</b> | <b>Photophysical properties</b> .....                    | S21 |
| <b>8</b> | <b>Chiroptical properties</b> .....                      | S22 |
| <b>9</b> | <b>CP-OLEDs performances</b> .....                       | S22 |

## 1 General information

Unless other noted, all reagents used in the experiments were purchased from commercial sources without further purification. For column chromatography, silica gel with 200 ~ 300 mesh was used.

In order to determine the structure of the compound,  $^1\text{H}$  NMR and  $^{13}\text{C}$  NMR spectra were acquired using a Bruker Dex-300/400/500 NMR instrument using  $\text{CDCl}_3$  and DMSO as a solvent. Mass spectra (MS) were recorded on a Bruker Autoflex MALDI-TOF instrument using dithranol as a matrix.

Thermogravimetric analysis (TGA) was detected with a NETZSCH STA449 from  $25^\circ\text{C}$  to  $800^\circ\text{C}$  at a  $20^\circ\text{C}/\text{min}$  heating rate under  $\text{N}_2$  atmosphere. UV-vis absorption spectra were recorded on a Shimadzu UV-1650PC. Steady-state fluorescence/phosphorescence spectra PL spectra were carried out by using Edinburgh FLS1000 fluorescence spectrophotometer. The UPS measurements were performed by PHI 5000 VersaProbe III with a base pressure of the analyzer chamber in the lower  $10^{-8}$  Pa range. CD and CPL spectra were measured on JASCO J-1500 and JASCO CPL-200 spectrophotometers, respectively.

Solution-processed device: Poly (styrene sulfonate) (PEDOT: PSS) was purchased from Xi'an Polymer Light Technology Corp. Tris[2-(p-tolyl)pyridine]iridium(III) ( $\text{Ir}(\text{mppy})_3$ ), Bis(1-phenyl-isoquinoline)(acetylacetonato)iridium(III) ( $\text{Ir}(\text{piq})_2(\text{acac})$ ), [bis(2-(diphenylphosphino) phenyl) ether oxide (DPEPO), (1,3,5-tri(m-pyrid-3-ylphenyl) benzene) (TmPyPB), and LiF were purchased from Lumtec. All commercially available reagents were used without further purification. In devices, PEDOT: PSS was used as hole injection material.  $\text{Ir}(\text{mppy})_3$  and  $\text{Ir}(\text{piq})_2(\text{acac})$  were chosen as emitter material and DPEPO was used as hole blocking materials. TmPyPB and LiF were used as electron transport and injection materials, respectively. ITO (Indium tin oxide) and Al (Aluminum) were used as anode and cathode materials, respectively.

The substrates were successively cleaned with isopropyl alcohol, acetone, detergent, deionized water, and isopropyl alcohol in an ultrasonic bath and then dried overnight in the oven. The substrates pre-treated by oxygen plasma to increase the work function of the ITO film. Then, 40 nm-thick PEDOT: PSS was spin-coated onto the ITO substrates at 3200 rpm for 30 s and annealed at  $150^\circ\text{C}$  for 15 min. And then emissive layer was spin-coated and annealed at  $60^\circ\text{C}$  or  $110^\circ\text{C}$  for 30 min using a precursor containing different materials co-dissolved in chlorobenzene or toluene.

The films of DPEPO, TmPyPB, LiF and aluminum were prepared by thermal evaporation under a vacuum of  $1 \times 10^{-4}$  Pa. Each sample has an active area of 0.04 cm<sup>2</sup>.

All the devices were encapsulated before characterization to prevent degradation and emission quenching caused by oxygen and water. The EL spectra and J–V–R curves were obtained with a PHOTORESEARCH Spectra Scan PR735 photometer and a KEITHLEY 2400 Source Meter constant current source at room temperature. The EQE values were calculated by assuming a Lambertian distribution. The circularly polarized electroluminescence (CPEL) spectra were measured on a Jasco CPL-200 spectrophotometer with „Standard“ sensitivity at 200 nm/min scan speed and respond time of 2.0 s employing “band” mode.

## 2 Synthetic procedures and characterized data

### 2.1 Synthetic procedures

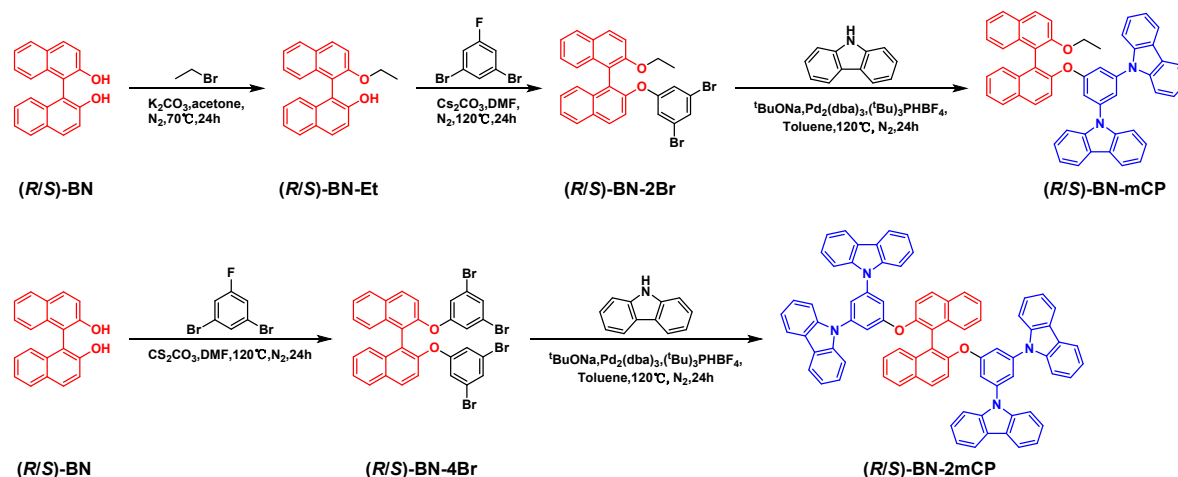

Scheme S1 Synthetic route of *(R/S)*-BN-mCP and *(R/S)*-BN-2mCP

#### Preparation procedure for *(R)*-BN-Et

Acetone (8 mL) was added to a 25 mL two-neck flask charged with *(R)*-[1,1'-binaphthalene]-2,2'-diol (500 mg, 1.75 mmol), Bromoethane (158.54 mg, 1.46 mmol) and K<sub>2</sub>CO<sub>3</sub> (1608.76 mg, 11.64 mmol) in nitrogen atmosphere. The mixture was stirred at 70 °C for 24 hours. After cooling down to room temperature, the acetone was removed by a rotatory evaporation and then the mixture was diluted with dichloromethane and washed with water and dried over MgSO<sub>4</sub>. The solvent was removed by a rotatory evaporation and the crude product was purified by silica gel column chromatography (PE: DCM = 3:2) to give the product *(R)*-BN-Et as white sticky substance (366

mg, 80%). <sup>1</sup>H NMR (400 MHz, Chloroform-*d*) δ 8.00 (d, *J* = 9.1 Hz, 1H), 7.91 – 7.82 (m, 3H), 7.44 (d, *J* = 9.1 Hz, 1H), 7.38 – 7.16 (m, 6H), 7.05 (d, *J* = 8.4 Hz, 1H), 4.98 (s, 1H), 4.13 – 4.01 (m, 2H), 1.10 (t, *J* = 7.0 Hz, 3H). <sup>13</sup>C NMR (126 MHz, Chloroform-*d*) δ 155.33, 151.33, 134.19, 133.89, 130.88, 129.73, 129.57, 129.16, 128.18, 128.13, 127.24, 126.33, 125.13, 125.03, 124.25, 123.20, 117.59, 116.45, 115.63, 115.32, 65.25, 14.92. (**Fig. S1, S2**).

#### ***Preparation procedure for (R)-BN-2Br***

Dry N, N-Dimethylformamide (20 mL) was added to a 50 mL two-neck flask charged with **(R)-BN-Et** (1.2 g, 3.82 mmol), 1,3-dibromo-5-fluorobenzene (1.16 g, 4.58 mmol) and CS<sub>2</sub>CO<sub>3</sub> (1.49 g, 4.58 mmol) in nitrogen atmosphere. The mixture was stirred at 120 °C for 24 hours. After cooling down to room temperature, the mixture was diluted with dichloromethane and washed with water and dried over MgSO<sub>4</sub>. The solvent was removed by a rotatory evaporation and the crude product was purified by silica gel column chromatography (PE) to give the product **(R)-BN-2Br** as white solid (1.46 g, 69%). <sup>1</sup>H NMR (400 MHz, Chloroform-*d*) δ 7.95 – 7.77 (m, 4H), 7.41 (ddd, *J* = 8.1, 5.4, 2.6 Hz, 1H), 7.31 – 7.12 (m, 8H), 6.80 (d, *J* = 1.5 Hz, 2H), 3.96 (q, *J* = 7.0 Hz, 2H), 1.06 (t, *J* = 7.0 Hz, 3H). <sup>13</sup>C NMR (126 MHz, Chloroform-*d*) δ 159.52, 154.18, 150.90, 134.34, 133.90, 131.35, 130.06, 130.00, 128.94, 128.16, 128.06, 127.61, 126.70, 126.65, 126.26, 125.45, 125.37, 125.10, 123.63, 122.62, 120.64, 119.94, 117.72, 114.19, 64.46, 15.08. (**Fig. S3, S4**).

#### ***Preparation procedure for (R)-BN-mCP***

Dry toluene (10 mL) was added to a 50 mL two-neck flask charged with **(R)-BN-2Br** (366 mg, 0.66 mmol), 9H-carbazole (329.42 mg, 1.97 mmol), Pd<sub>2</sub>(dba)<sub>3</sub> (48.12 mg, 0.05 mmol), <sup>t</sup>Bu<sub>3</sub>PHBF<sub>4</sub> (30.49 mg, 0.11 mmol) and <sup>t</sup>BuONa (252.44 mg, 2.63 mmol) in nitrogen atmosphere. The mixture was stirred at 120 °C for 24 hours. After cooling down to room temperature, the toluene was removed by a rotatory evaporation and then the mixture was diluted with dichloromethane and washed with water and dried over MgSO<sub>4</sub>. The solvent was removed by a rotatory evaporation and the crude product was purified by silica gel column chromatography (PE: DCM = 8:1) to give the product **(R)-BN-mCP** as white solid (365 mg, 77%). <sup>1</sup>H NMR (400 MHz, Chloroform-*d*) δ 8.06 (dd, *J* = 18.1, 8.3 Hz, 5H), 7.96 – 7.88 (m, 3H), 7.61 (d, *J* = 8.9 Hz, 1H), 7.41 – 7.32 (m, 6H), 7.29 – 7.26 (m, 8H), 7.24 – 7.15 (m, 6H), 7.02 (d, *J* = 1.7 Hz, 2H), 3.71 – 3.49 (m, 2H), 0.48 (t, *J* = 7.0 Hz, 3H). <sup>13</sup>C NMR (126 MHz, Chloroform-*d*) δ 154.13, 140.16, 139.28, 134.18, 133.59, 131.24, 129.96, 129.91, 128.91, 128.02, 127.86, 126.69, 126.44, 125.99, 125.19, 125.16, 124.98, 123.60,

123.44, 120.82, 120.27, 120.20, 117.96, 114.32, 109.84, 64.28, 14.25. TOF-MS (ESI) m/z calcd for C<sub>52</sub>H<sub>36</sub>N<sub>2</sub>O<sub>2</sub> [M]<sup>+</sup>: 720.28; found:720.54. (**Fig. S5, S6, S15**).

#### ***Preparation procedure for (S)-BN-mCP***

The synthesis method and procedure are the same as **(R)-BN-mCP**. <sup>1</sup>H NMR (400 MHz, Chloroform-d) δ 8.06 (dd, J = 18.1, 8.3 Hz, 5H), 7.96 – 7.88 (m, 3H), 7.61 (d, J = 8.9 Hz, 1H), 7.41 – 7.32 (m, 6H), 7.29 – 7.26 (m, 8H), 7.24 – 7.15 (m, 6H), 7.02 (d, J = 1.7 Hz, 2H), 3.71 – 3.49 (m, 2H), 0.48 (t, J = 7.0 Hz, 3H). <sup>13</sup>C NMR (126 MHz, Chloroform-d) δ 154.13, 140.16, 139.28, 134.18, 133.59, 131.24, 129.96, 129.91, 128.91, 128.02, 127.86, 126.69, 126.44, 125.99, 125.19, 125.16, 124.98, 123.60, 123.44, 120.82, 120.27, 120.20, 117.96, 114.32, 109.84, 64.28, 14.25. TOF-MS (ESI) m/z calcd for C<sub>52</sub>H<sub>36</sub>N<sub>2</sub>O<sub>2</sub> [M]<sup>+</sup>: 720.28; found:720.21. (**Fig. S7, S8, S16**).

#### ***Preparation procedure for (R)-BN-4Br***

Dry N, N-Dimethylformamide (30 mL) was added to a 100 mL two-neck flask charged with **(R)-[1,1'-binaphthalene]-2,2'-diol** (1.02 g, 3.56 mmol), 1,3-dibromo-5-fluorobenzene (2 g, 7.88 mmol) and CS<sub>2</sub>CO<sub>3</sub> (2.78 g, 7.88 mmol) in nitrogen atmosphere. The mixture was stirred at 120 °C for 24 hours. After cooling down to room temperature, the mixture was diluted with dichloromethane and washed with water and dried over MgSO<sub>4</sub>. The solvent was removed by a rotatory evaporation and the crude product was purified by silica gel column chromatography (PE) to give the product **(R)-BN-4Br** as white solid (1.68 g, 63%). <sup>1</sup>H NMR (500 MHz, DMSO-*d*<sub>6</sub>) δ 8.15 (d, J = 9.0 Hz, 2H), 8.07 (d, J = 7.9 Hz, 2H), 7.52 (t, J = 7.2 Hz, 2H), 7.48 – 7.31 (m, 6H), 7.09 (d, J = 8.5 Hz, 2H), 6.87 (d, J = 1.5 Hz, 4H). <sup>13</sup>C NMR (126 MHz, DMSO-*d*<sub>6</sub>) δ 158.24, 150.02, 133.27, 130.96, 130.67, 128.45, 127.73, 127.30, 125.64, 125.11, 122.84, 121.87, 119.64, 119.34. (**Fig. S9, S10**).

#### ***Preparation procedure for (R)-BN-2mCP***

Dry toluene (25 mL) was added to a 50 mL two-neck flask charged with **(R)-BN-4Br** (900 mg, 1.19 mmol), 9H-carbazole (897.91 mg, 5.37 mmol), Pd<sub>2</sub>(dba)<sub>3</sub> (87.46 mg, 0.09 mmol), <sup>t</sup>Bu<sub>3</sub>PHBF<sub>4</sub> (55.43 mg, 0.19 mmol) and <sup>t</sup>BuONa (458.79 mg, 4.77 mmol) in nitrogen atmosphere. The mixture was stirred at 120 °C for 24 hours. After cooling down to room temperature, the toluene was removed by a rotatory evaporation and then the mixture was diluted with dichloromethane and washed with water and dried over MgSO<sub>4</sub>. The solvent was removed by a rotatory evaporation and the crude product was purified by silica gel column chromatography (PE: DCM = 7:1) to give the product **(R)-BN-2mCP** as white solid (559 mg, 43%). <sup>1</sup>H NMR (400 MHz, DMSO-*d*<sub>6</sub>) δ 8.24 (dd, J

= 9.0, 5.0 Hz, 2H), 8.02 (dd,  $J = 13.5, 8.2$  Hz, 10H), 7.76 (d,  $J = 8.9$  Hz, 2H), 7.44 – 7.37 (m, 2H), 7.26 (t,  $J = 7.6$  Hz, 8H), 7.15 (dt,  $J = 24.8, 7.0$  Hz, 22H), 6.91 – 6.85 (m, 4H).  $^{13}\text{C}$  NMR (126 MHz, DMSO- $d_6$ )  $\delta$  159.62, 151.73, 139.99, 139.62, 133.73, 131.15, 128.83, 127.53, 126.57, 125.89, 125.56, 123.28, 122.66, 121.00, 120.78, 120.68, 119.14, 115.14, 109.89. TOF-MS (ESI)  $m/z$  calcd for  $\text{C}_{80}\text{H}_{50}\text{N}_4\text{O}_2$   $[\text{M}]^+$ : 1098.39; found:1098.45. (Fig. S11, S12, S17).

### Preparation procedure for (S)-BN-2mCP

The synthesis method and procedure are the same as (R)-BN-2mCP.  $^1\text{H}$  NMR (400 MHz, DMSO- $d_6$ )  $\delta$  8.26 (d,  $J = 8.8$  Hz, 2H), 8.09 – 7.98 (m, 10H), 7.77 (d,  $J = 8.9$  Hz, 2H), 7.44 (s, 2H), 7.26 (t,  $J = 7.6$  Hz, 8H), 7.15 (dt,  $J = 25.7, 8.2$  Hz, 22H), 6.89 (s, 4H).  $^{13}\text{C}$  NMR (126 MHz, DMSO- $d_6$ )  $\delta$  159.62, 151.73, 139.99, 139.62, 133.73, 131.15, 128.83, 127.53, 126.57, 125.89, 125.56, 123.28, 122.66, 121.00, 120.78, 120.68, 119.14, 115.14, 109.89. TOF-MS (ESI)  $m/z$  calcd for  $\text{C}_{80}\text{H}_{50}\text{N}_4\text{O}_2$   $[\text{M}]^+$ : 1098.39; found:1098.25. (Fig. S13, S14, S18).

## 2.2 Characterization data

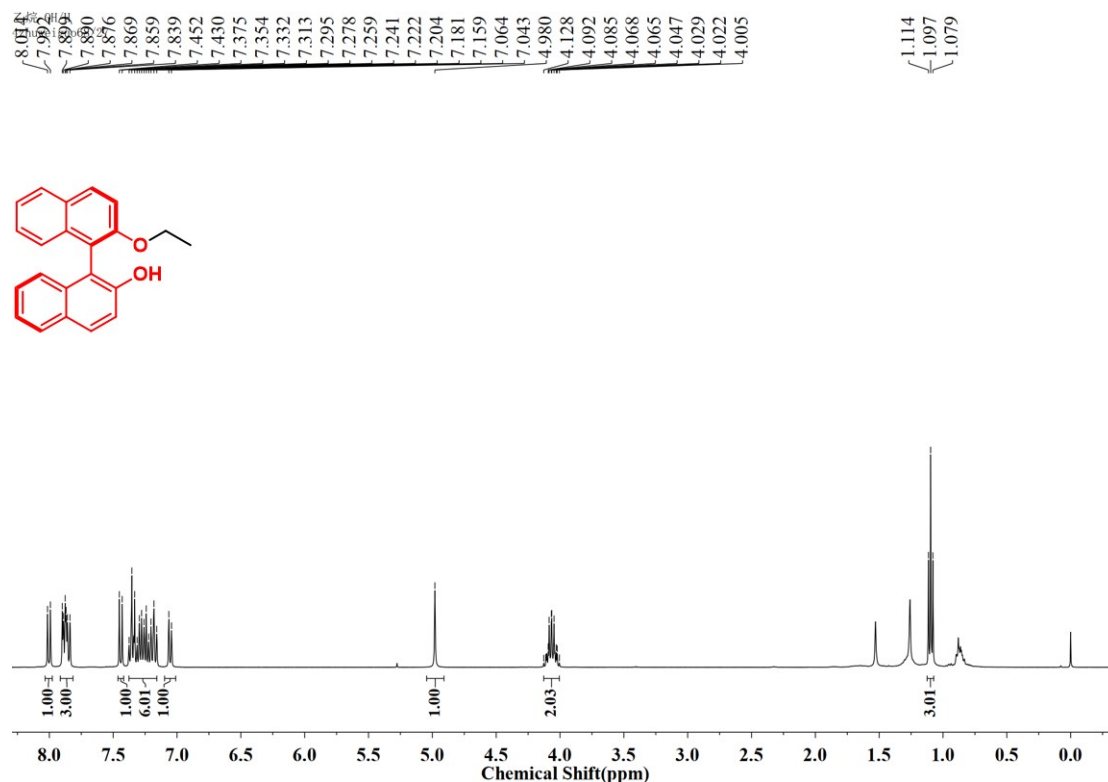

Fig. S1  $^1\text{H}$  NMR spectrum of (R)-BN-Et in  $\text{CDCl}_3$ .

乙醇 OH/C  
6

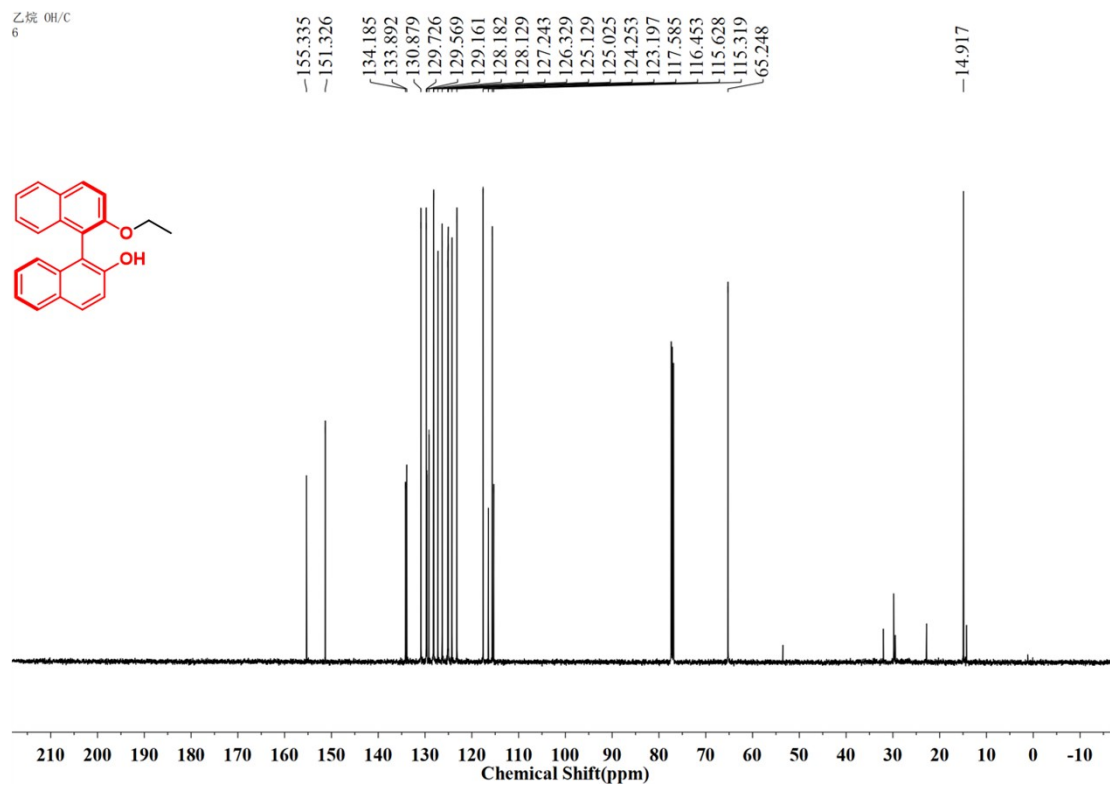

Fig. S2  $^{13}\text{C}$  NMR spectrum of (*R*)-BN-Et in  $\text{CDCl}_3$ .

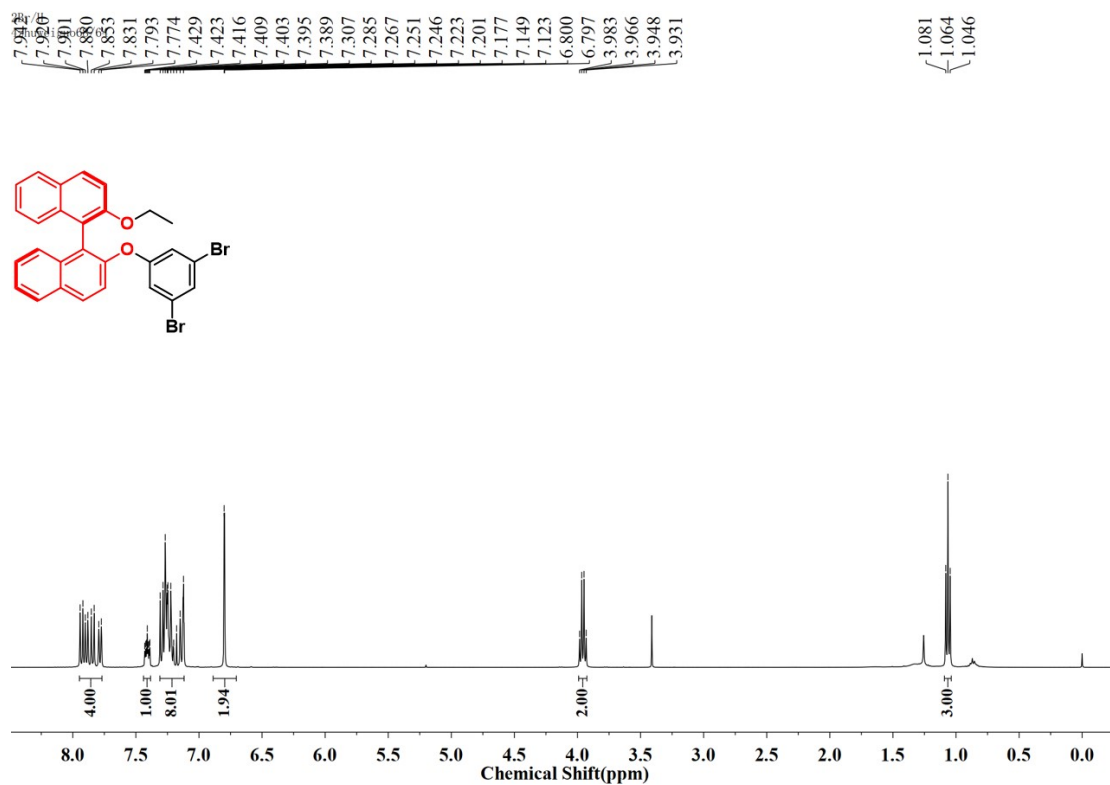

Fig. S3  $^1\text{H}$  NMR spectrum of (*R*)-BN-2Br in  $\text{CDCl}_3$ .



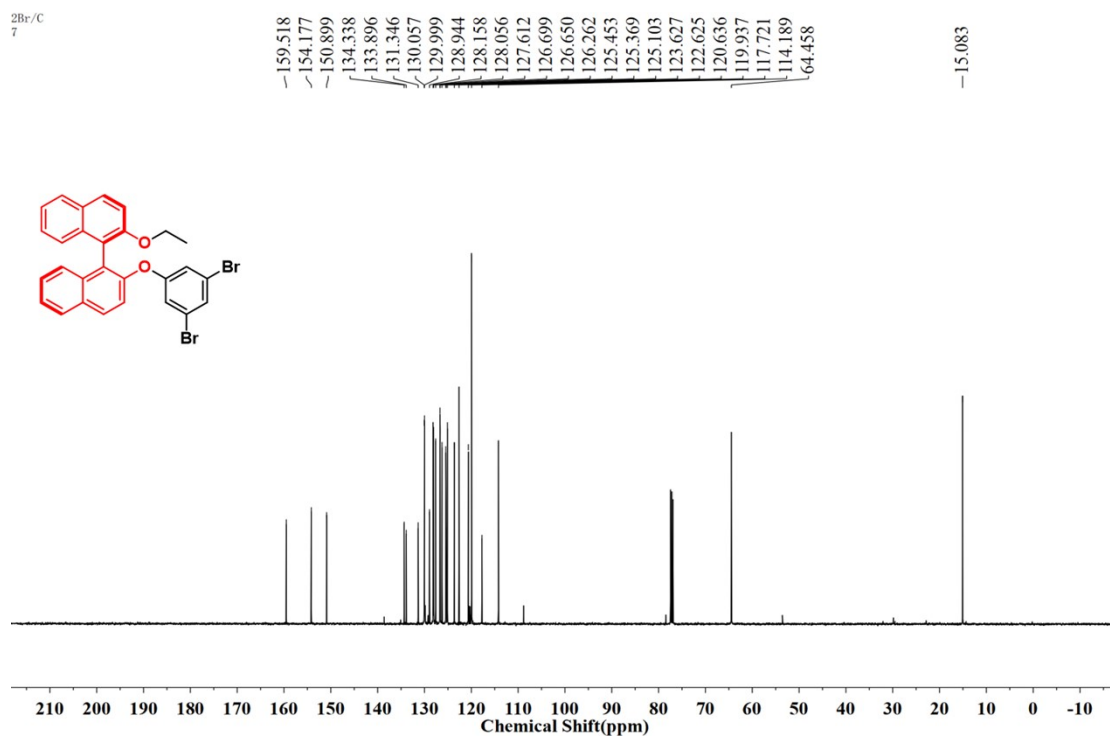

Fig. S4  $^{13}\text{C}$  NMR spectrum of (*R*)-BN-2Br in  $\text{CDCl}_3$ .

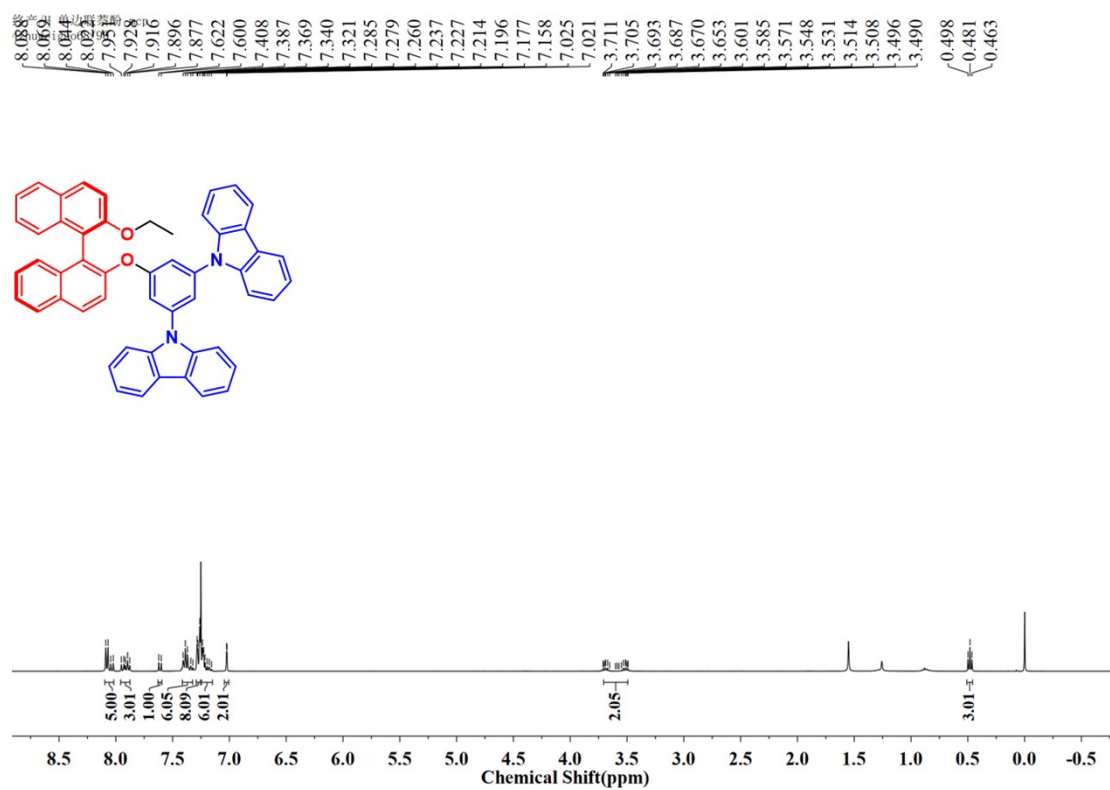

Fig. S5  $^1\text{H}$  NMR spectrum of (*R*)-BN-mCP in  $\text{CDCl}_3$ .

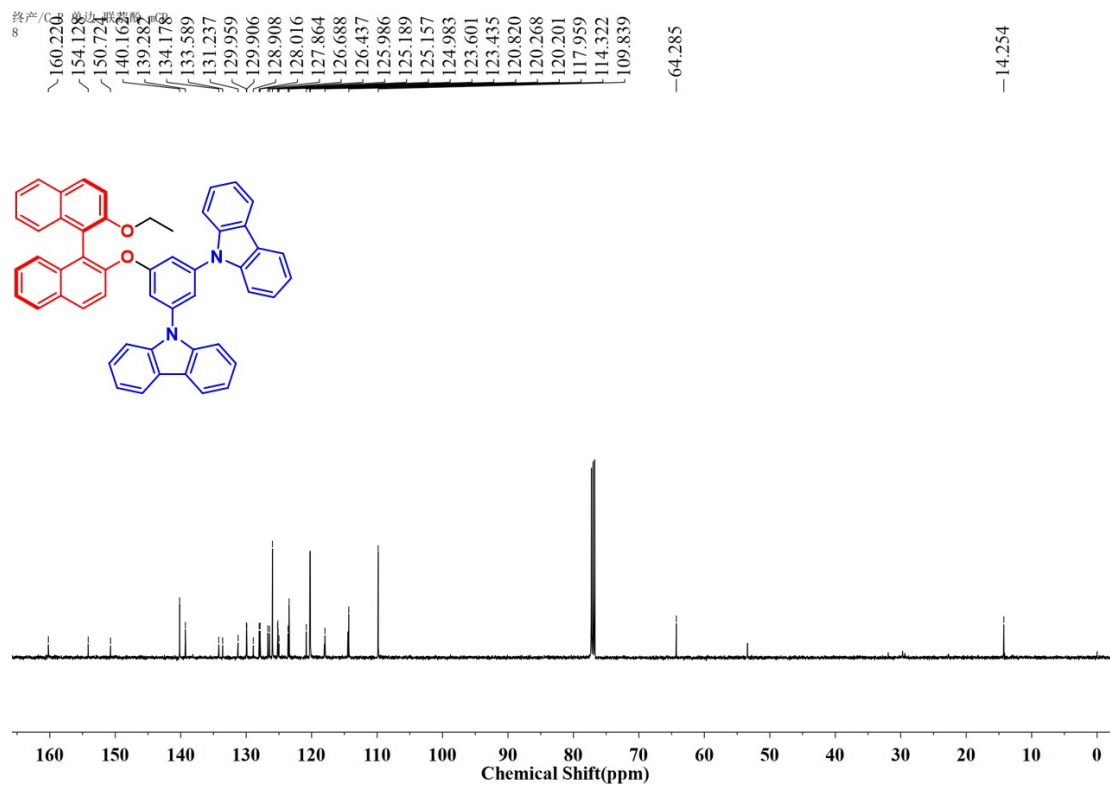

Fig. S6 <sup>13</sup>C NMR spectrum of (*R*)-BN-mCP in CDCl<sub>3</sub>.

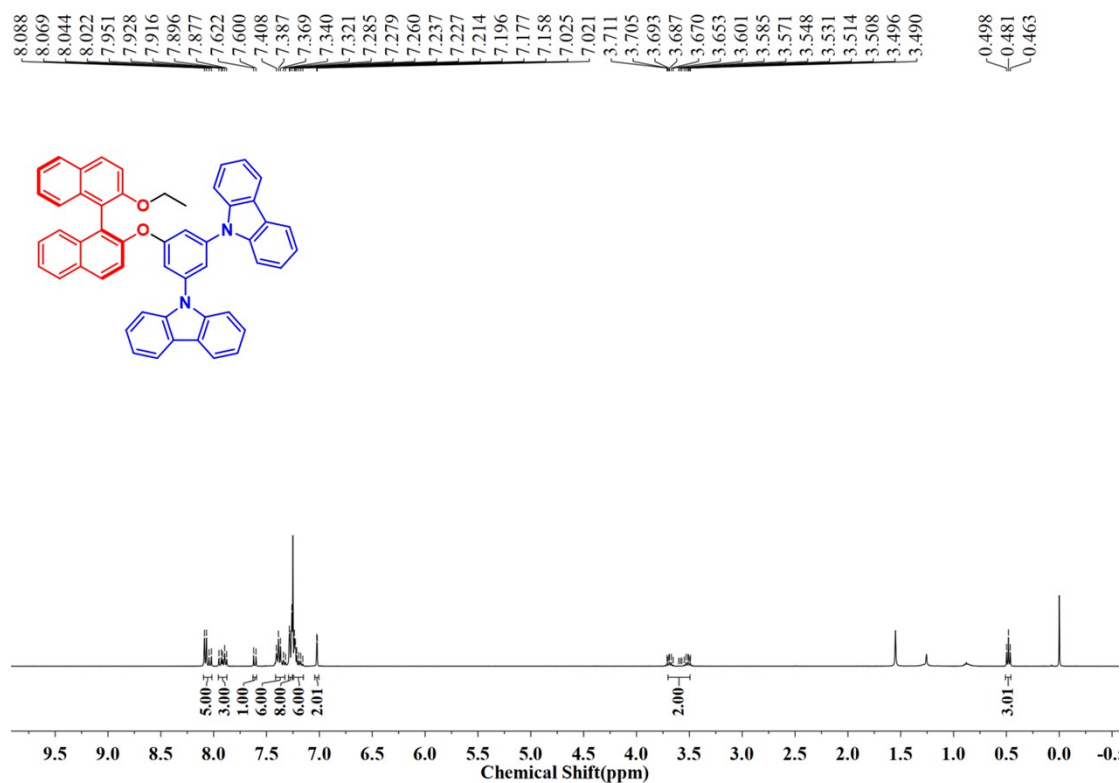

Fig. S7 <sup>1</sup>H NMR spectrum of (*S*)-BN-mCP in CDCl<sub>3</sub>.

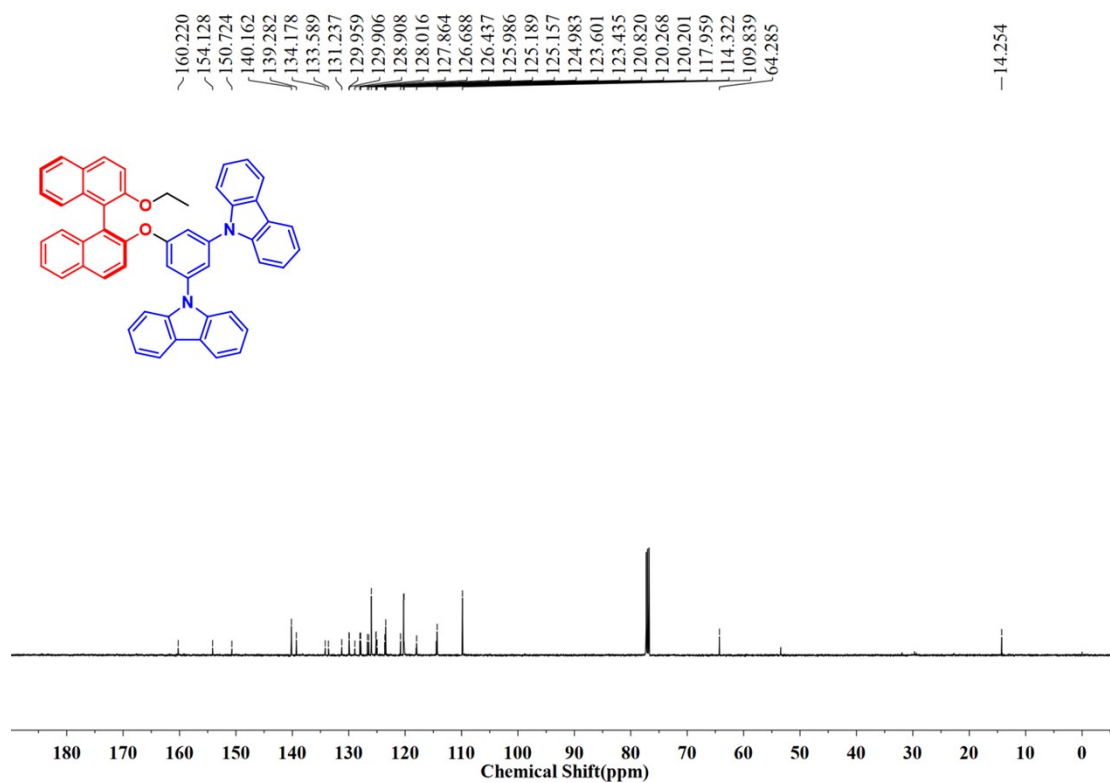

-14.254

Fig. S8 <sup>13</sup>C NMR spectrum of *(S)*-BN-mCP in CDCl<sub>3</sub>.

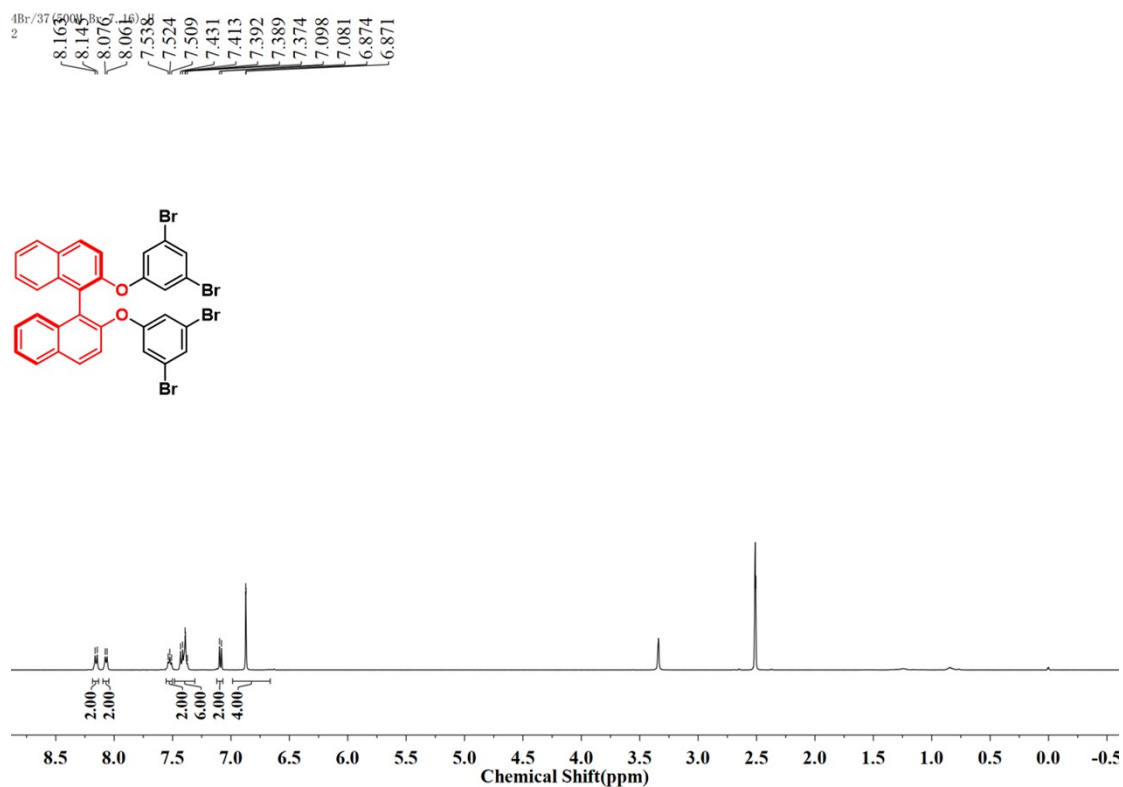

Fig. S9 <sup>1</sup>H NMR spectrum of *(R)*-BN-4Br in DMSO.

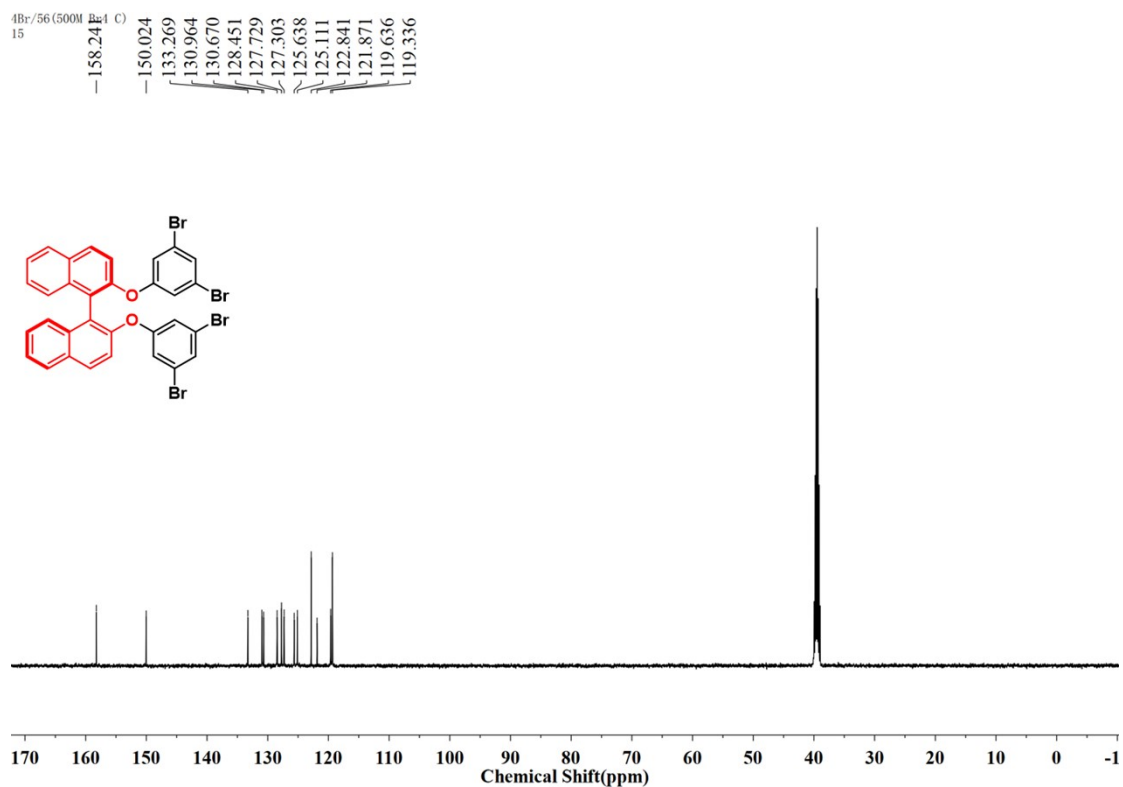

Fig. S10  $^{13}\text{C}$  NMR spectrum of (*R*)-BN-4Br in DMSO.

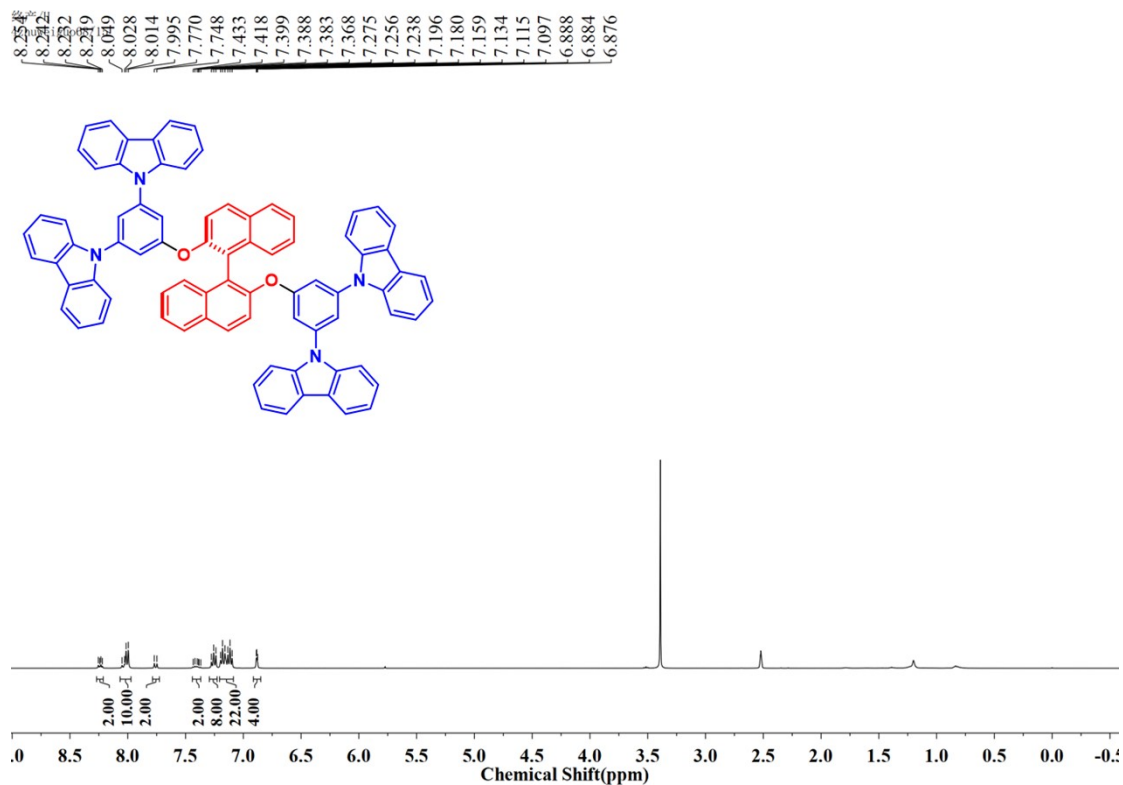

Fig. S11  $^1\text{H}$  NMR spectrum of (*R*)-BN-2mCP in DMSO.

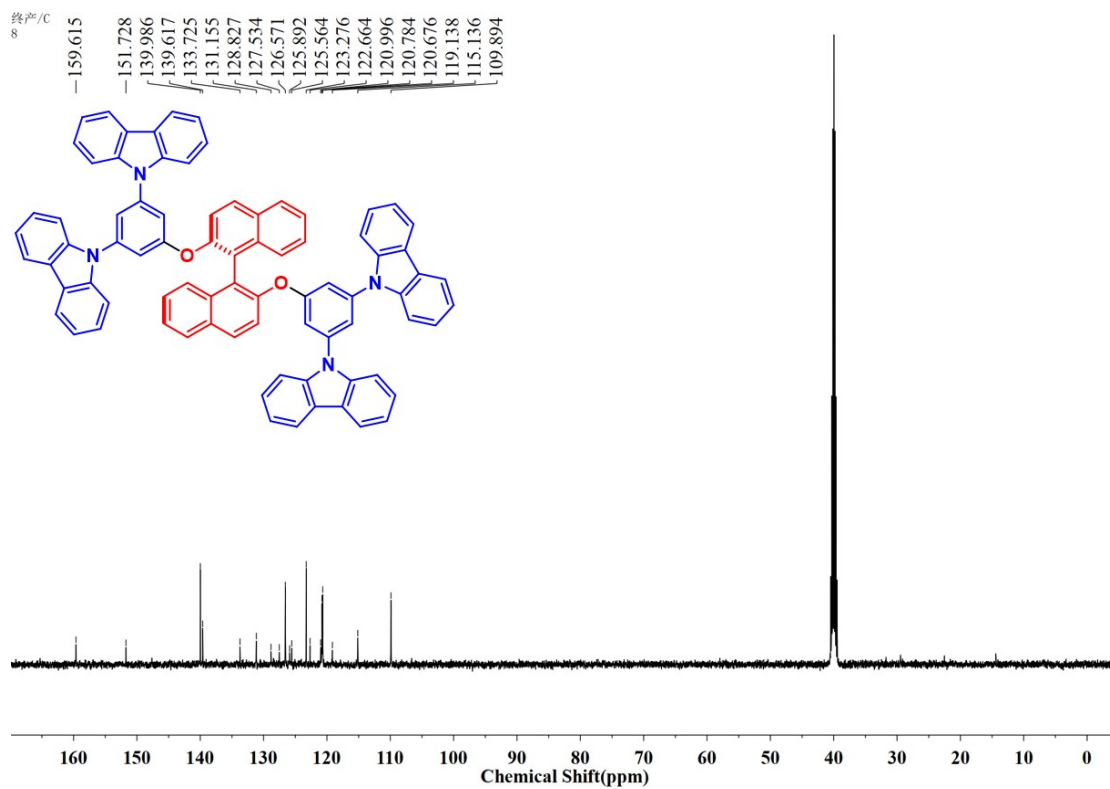

Fig. S12 <sup>13</sup>C NMR spectrum of (R)-BN-2mCP in DMSO.

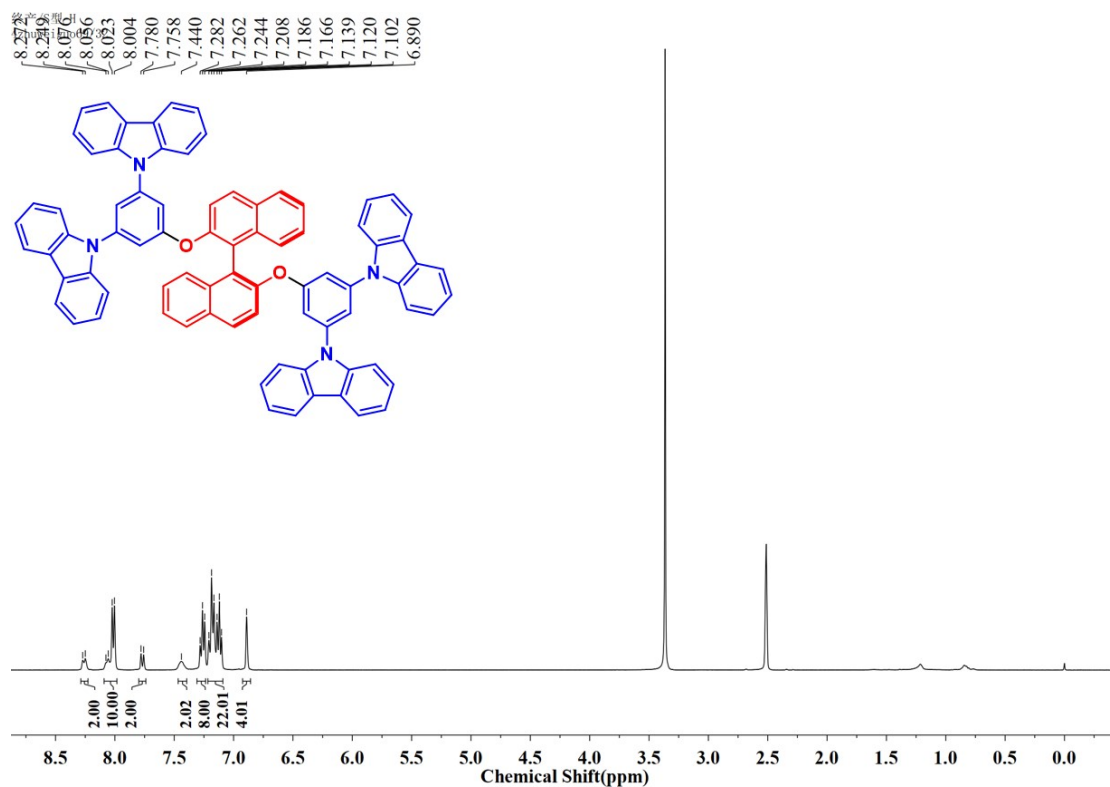

Fig. S13 <sup>1</sup>H NMR spectrum of (S)-BN-2mCP in DMSO.

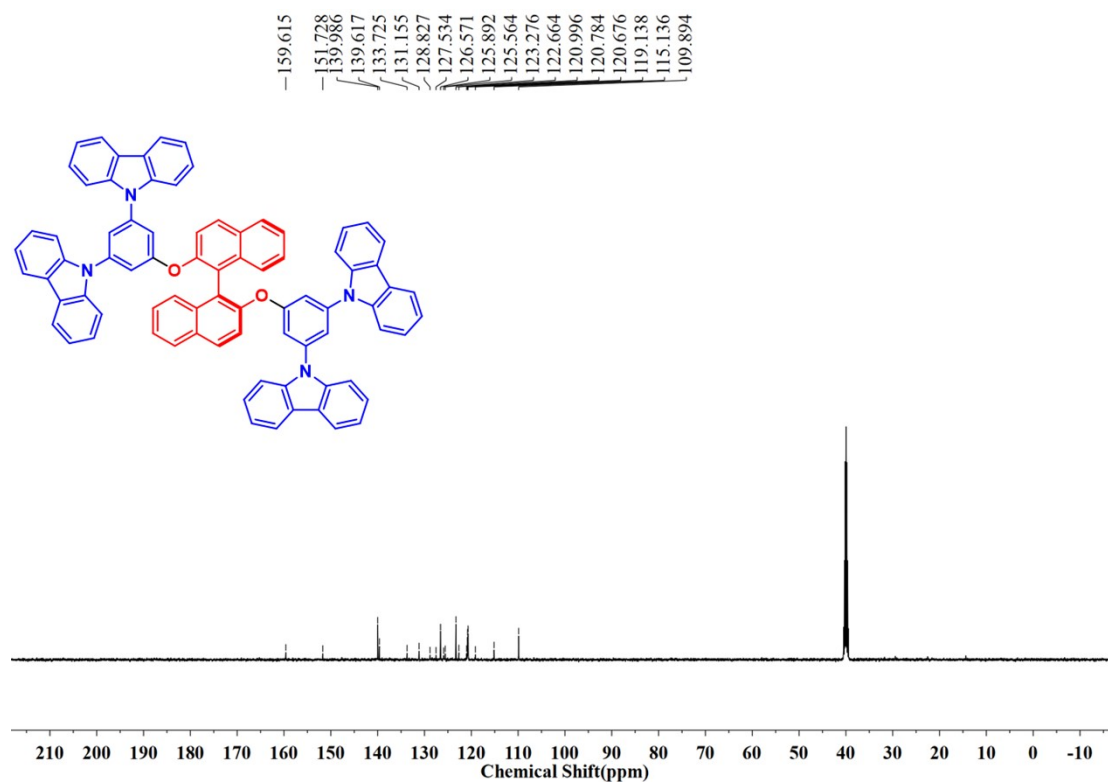

Fig. S14  $^{13}\text{C}$  NMR spectrum of (*S*)-BN-2mCP in DMSO.

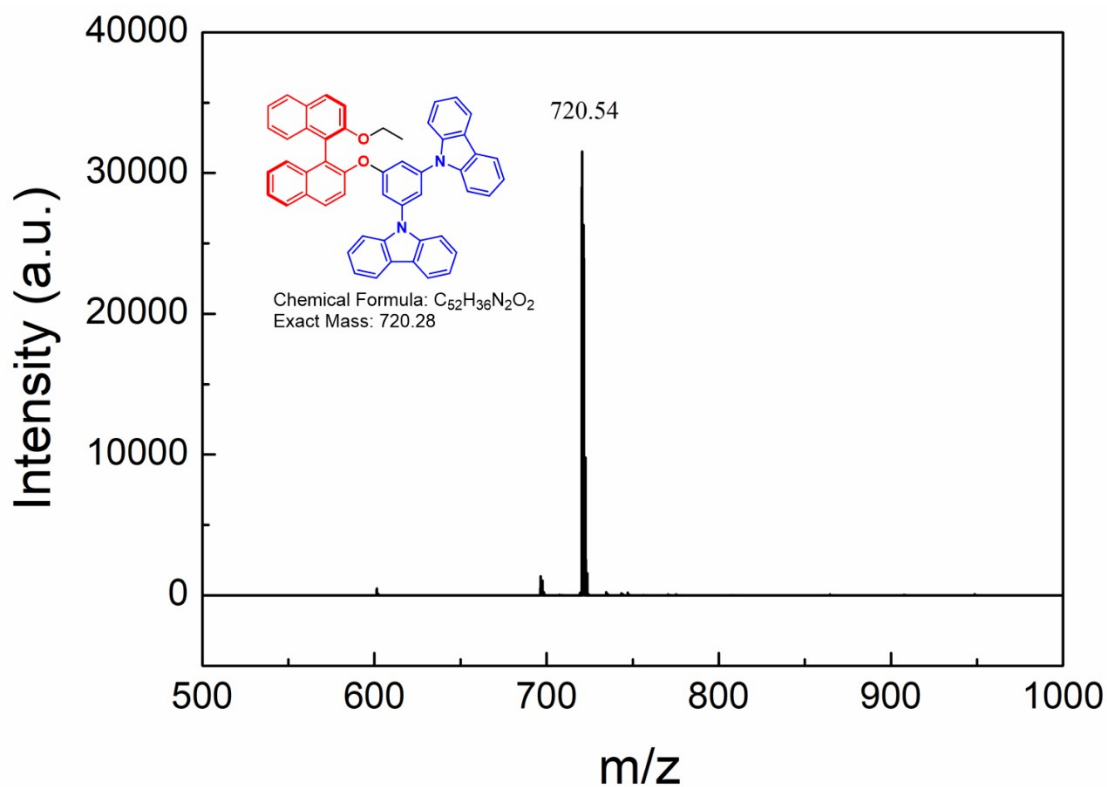

Fig. S15 Mass spectrum of (*R*)-BN-mCP.

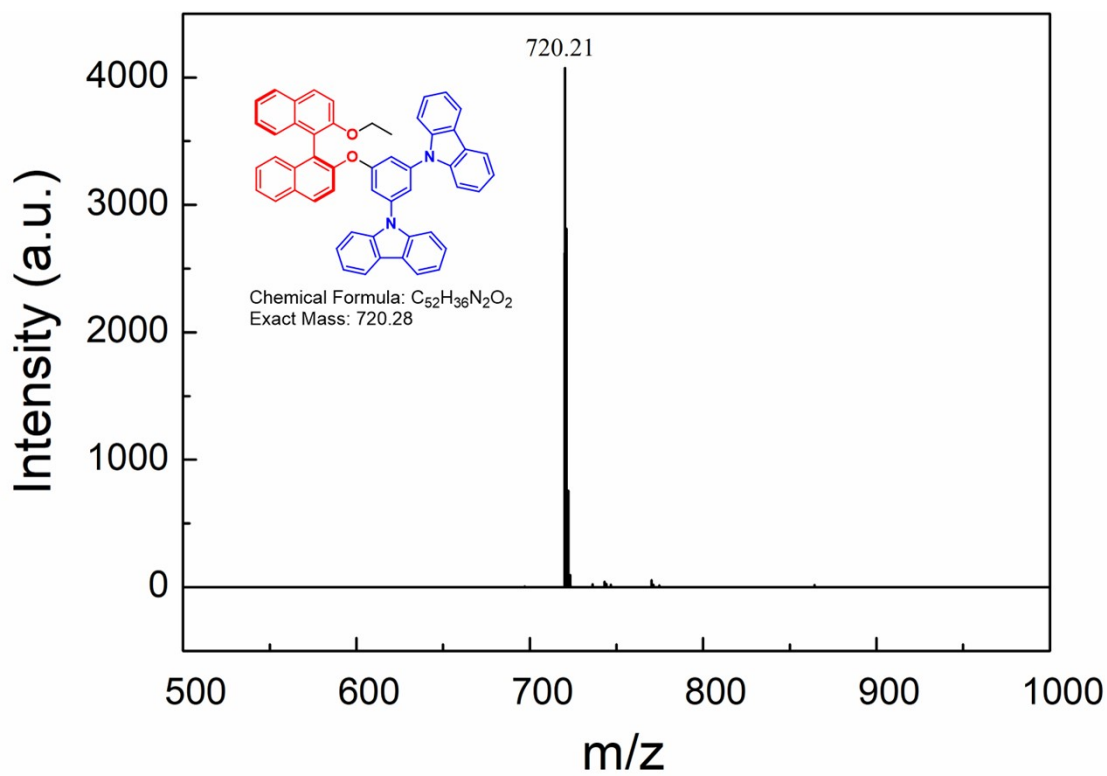

Fig. S16 Mass spectrum of (*S*)-BN-mCP.

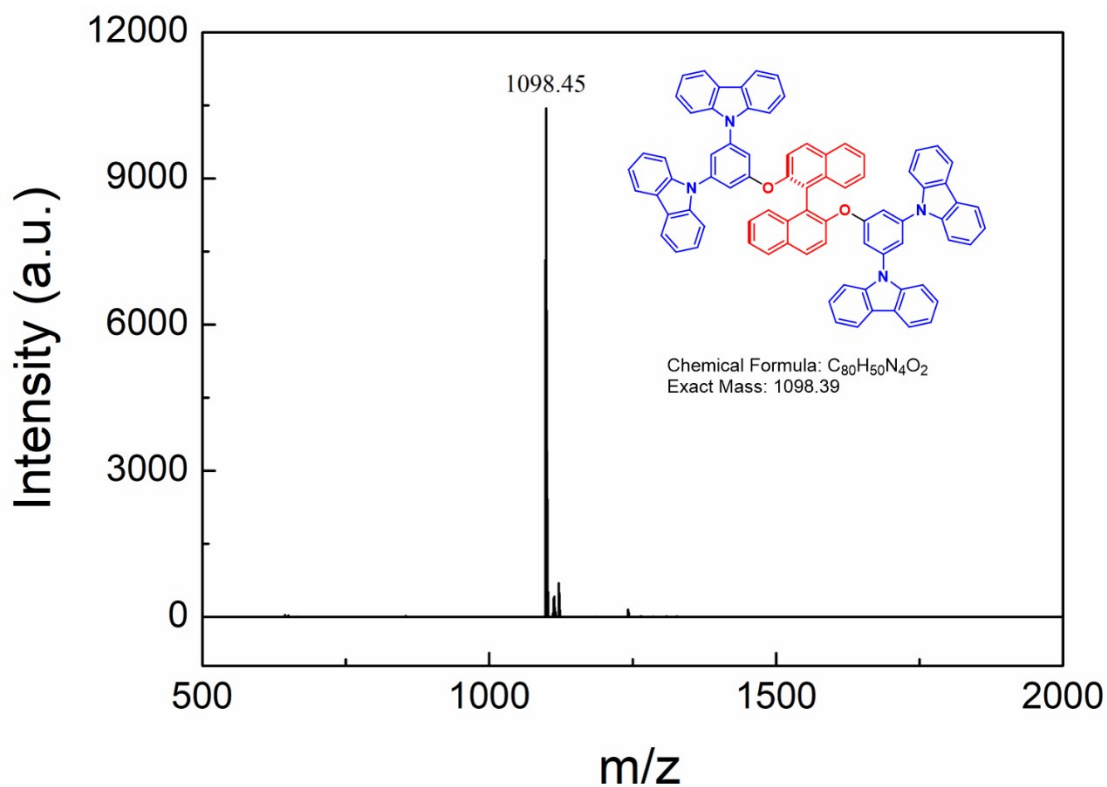

Fig. S17 Mass spectrum of (*R*)-BN-2mCP.

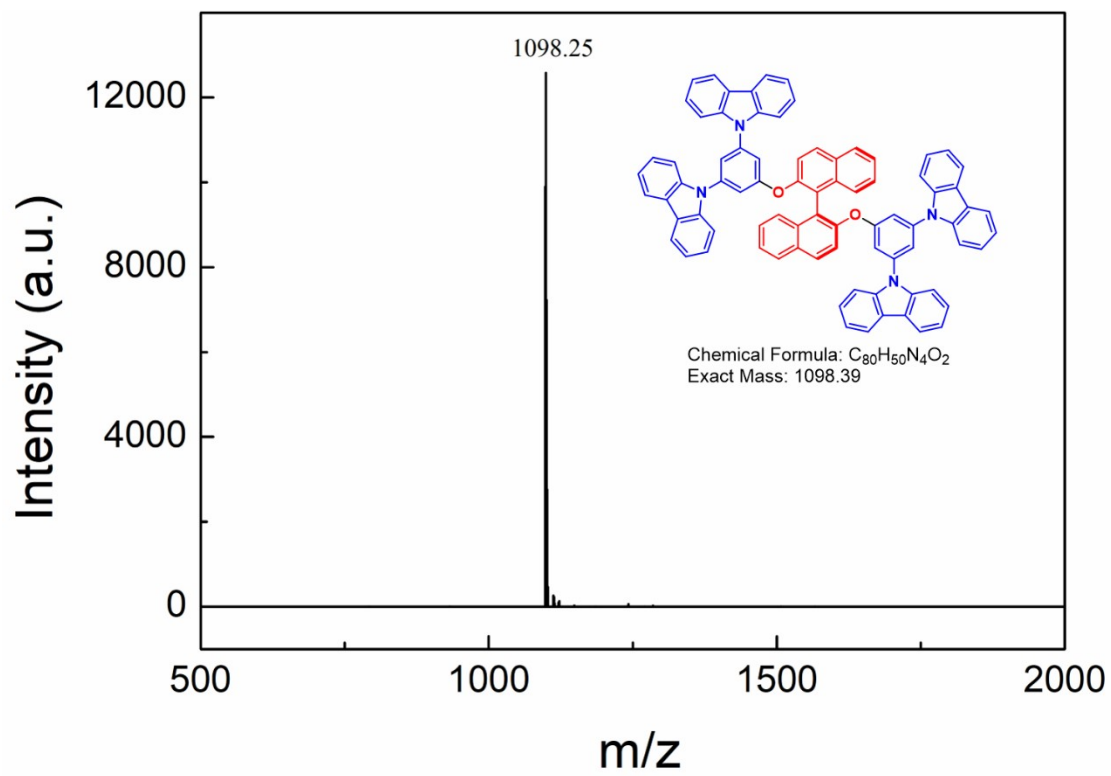

Fig. S18 Mass spectrum of (S)-BN-2mCP.



## 样品信息

|       |                         |         |                    |
|-------|-------------------------|---------|--------------------|
| 样品名称: | 3#                      | 采集者:    | System             |
| 样品类型: | 未知                      | 样品组名称:  | 20221215           |
| 瓶号:   | 3                       | 采集方法组:  | 水20 甲醇80 40°C 1108 |
| 进样次数: | 1                       | 处理方法:   | 072897             |
| 进样体积: | 0.50 ul                 | 通道名称:   | W2489 ChA          |
| 运行时间: | 30.0 Minutes            | 处理通道注释: | W2489 ChA 254nm    |
| 采集时间: | 2022/12/15 10:39:41 CST |         |                    |
| 处理时间: | 2022/12/15 13:07:32 CST |         |                    |

自动缩放色谱图

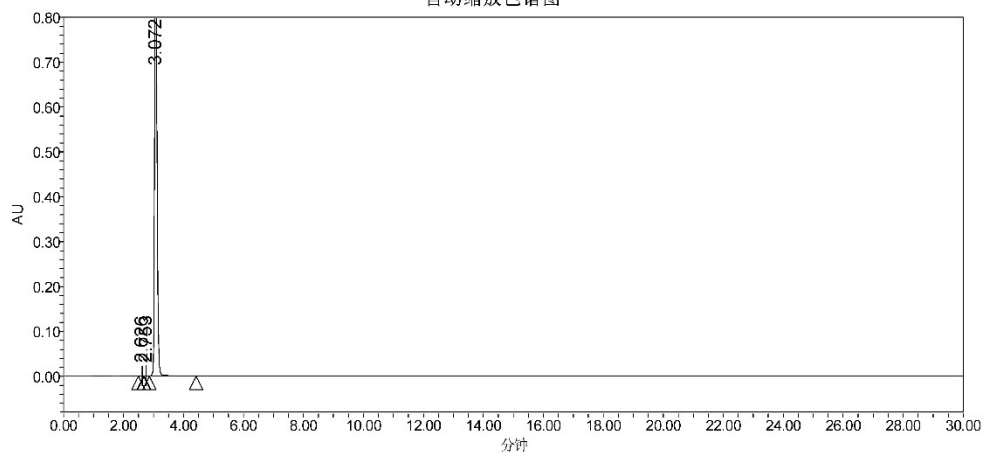

名称:

|   | 保留时间<br>(分钟) | 高度<br>(微伏) | 面积<br>(微伏*秒) | % 面积    |
|---|--------------|------------|--------------|---------|
| 1 | 2.626        | 212        | 959          | 0.0172  |
| 2 | 2.753        | 551        | 2240         | 0.0403  |
| 3 | 3.072        | 1041689    | 5554664      | 99.9424 |

报告用户: System  
报告方法: LC 报告  
报告方法 ID: 3045 30451  
页码: 1 (共计 1)

项目名称: CZCS\_OLED\_Defaults  
打印日期:  
2022/12/15  
13:07:57 PRC

Fig. S19 HPLC of (R)-BN-mCP.

## 样品信息

|       |                         |         |                    |
|-------|-------------------------|---------|--------------------|
| 样品名称: | 4#                      | 采集者:    | System             |
| 样品类型: | 未知                      | 样品组名称:  | 20221215           |
| 瓶号:   | 4                       | 采集方法组:  | 水20 甲醇80 40°C 1108 |
| 进样次数: | 1                       | 处理方法:   | 072897             |
| 进样体积: | 0.50 ul                 | 通道名称:   | W2489 ChA          |
| 运行时间: | 30.0 Minutes            | 处理通道注释: | W2489 ChA 254nm    |
| 采集时间: | 2022/12/15 11:10:33 CST |         |                    |
| 处理时间: | 2022/12/15 13:08:34 CST |         |                    |

自动缩放色谱图

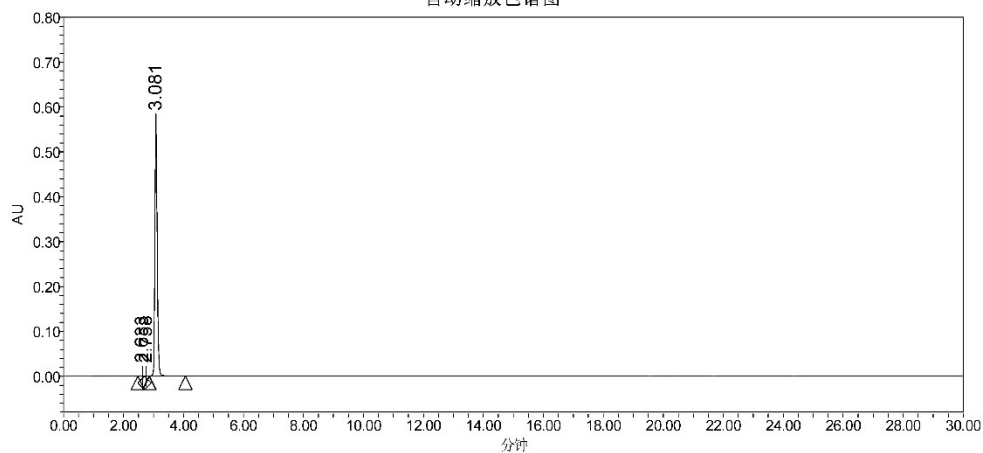

名称:

|   | 保留时间<br>(分钟) | 高度<br>(微伏) | 面积<br>(微伏*秒) | % 面积    |
|---|--------------|------------|--------------|---------|
| 1 | 2.633        | 438        | 2390         | 0.0793  |
| 2 | 2.758        | 318        | 1368         | 0.0454  |
| 3 | 3.081        | 562723     | 3008162      | 99.8753 |

报告用户: System  
报告方法: LC 报告  
报告方法 ID: 3045 30451  
页码: 1 (共计 1)

项目名称: CZCS\_OLED\_Defaults  
打印日期:  
2022/12/15  
13:08:54 PRC

Fig. S20 HPLC of (S)-BN-mCP.

## 样品信息

|       |                         |         |                    |
|-------|-------------------------|---------|--------------------|
| 样品名称: | 1#                      | 采集者:    | System             |
| 样品类型: | 未知                      | 样品组名称:  | 20221215           |
| 瓶号:   | 1                       | 采集方法组:  | 水20 甲醇80 40°C 1108 |
| 进样次数: | 1                       | 处理方法:   | 07282              |
| 进样体积: | 0.50 ul                 | 通道名称:   | W2489 ChA          |
| 运行时间: | 30.0 Minutes            | 处理通道注释: | W2489 ChA 254nm    |
| 采集时间: | 2022/12/15 09:38:08 CST |         |                    |
| 处理时间: | 2022/12/15 13:04:42 CST |         |                    |

自动缩放色谱图

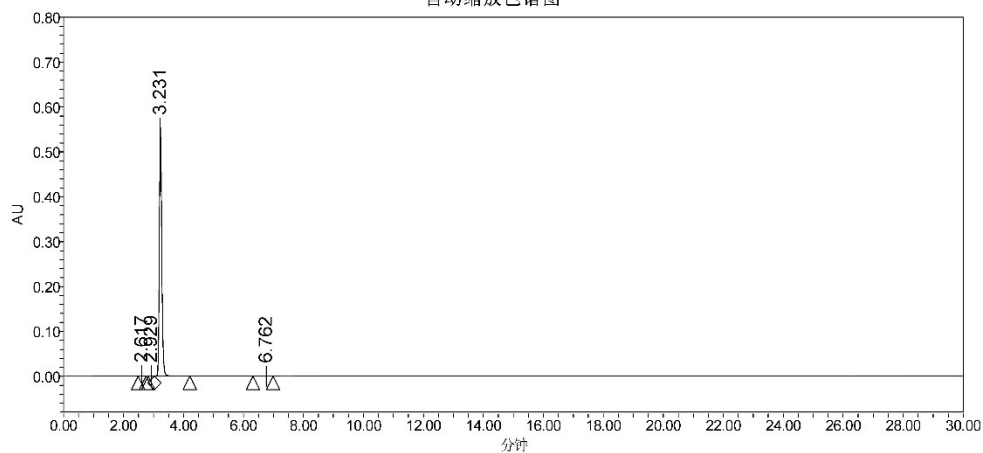

名称:

|   | 保留时间<br>(分钟) | 高度<br>(微伏) | 面积<br>(微伏*秒) | % 面积    |
|---|--------------|------------|--------------|---------|
| 1 | 2.617        | 1201       | 6123         | 0.1942  |
| 2 | 2.929        | 560        | 3230         | 0.1025  |
| 3 | 3.231        | 554050     | 3141231      | 99.6511 |
| 4 | 6.762        | 83         | 1645         | 0.0522  |

报告用户: System  
报告方法: LC 报告  
报告方法 ID: 3035 30357  
页码: 1 (共计 1)

项目名称: CZCS\_OLED\_Defaults  
打印日期:  
2022/12/15  
13:05:23 PRC

Fig. S21 HPLC of (R)-BN-2mCP.

## 样品信息

|       |                         |         |                    |
|-------|-------------------------|---------|--------------------|
| 样品名称: | 2#                      | 采集者:    | System             |
| 样品类型: | 未知                      | 样品组名称:  | 20221215           |
| 瓶号:   | 2                       | 采集方法组:  | 水20 甲醇80 40°C 1108 |
| 进样次数: | 1                       | 处理方法:   | 072897             |
| 进样体积: | 0.50 ul                 | 通道名称:   | W2489 ChA          |
| 运行时间: | 30.0 Minutes            | 处理通道注释: | W2489 ChA 254nm    |
| 采集时间: | 2022/12/15 10:08:49 CST |         |                    |
| 处理时间: | 2022/12/15 13:06:40 CST |         |                    |

自动缩放色谱图

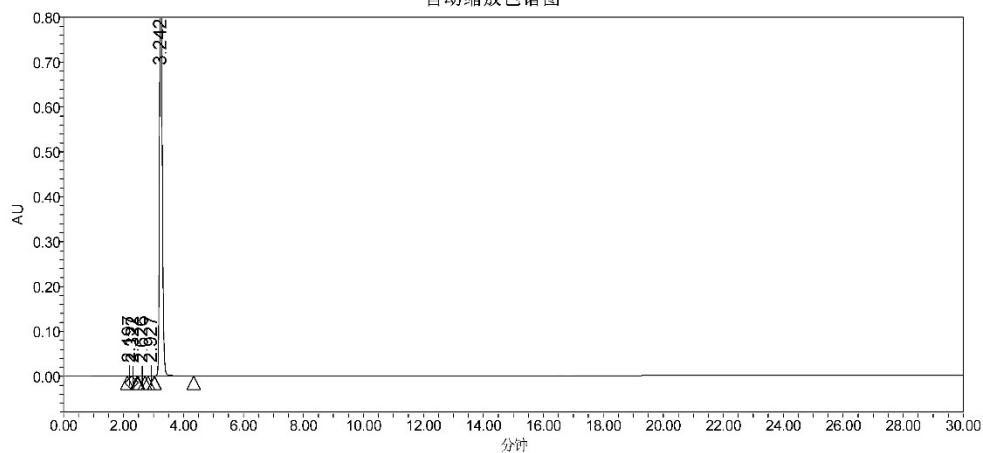

名称:

|   | 保留时间<br>(分钟) | 高度<br>(微伏) | 面积<br>(微伏*秒) | % 面积    |
|---|--------------|------------|--------------|---------|
| 1 | 2.197        | 259        | 1253         | 0.0199  |
| 2 | 2.322        | 161        | 938          | 0.0149  |
| 3 | 2.626        | 210        | 1349         | 0.0214  |
| 4 | 2.927        | 278        | 1824         | 0.0289  |
| 5 | 3.242        | 1091323    | 6298378      | 99.9149 |

报告用户: System  
报告方法: LC 报告  
报告方法 ID: 3045 30451  
页码: 1 (共计 1)

项目名称: CZCS\_OLED\_Defaults  
打印日期:  
2022/12/15  
13:06:52 PRC

Fig. S22 HPLC of (S)-BN-2mCP.

### 3 Thermal properties

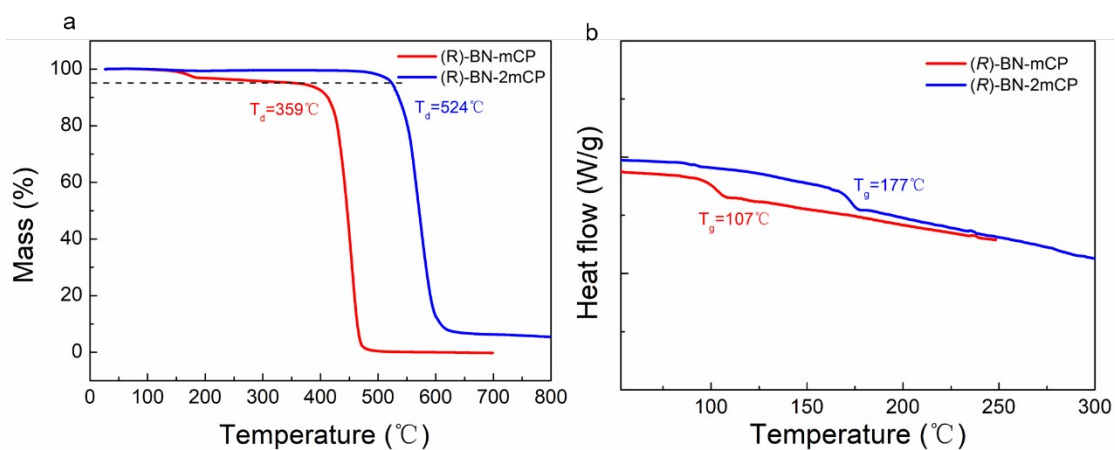

**Fig. S23** (a) TGA curves of the hosts in  $\text{N}_2$  with the heating rate of  $20^\circ\text{C min}^{-1}$ ; (b) DSC traces of the hosts recorded at a heating rate of  $10^\circ\text{C min}^{-1}$ .

### 4 Theoretical Calculations

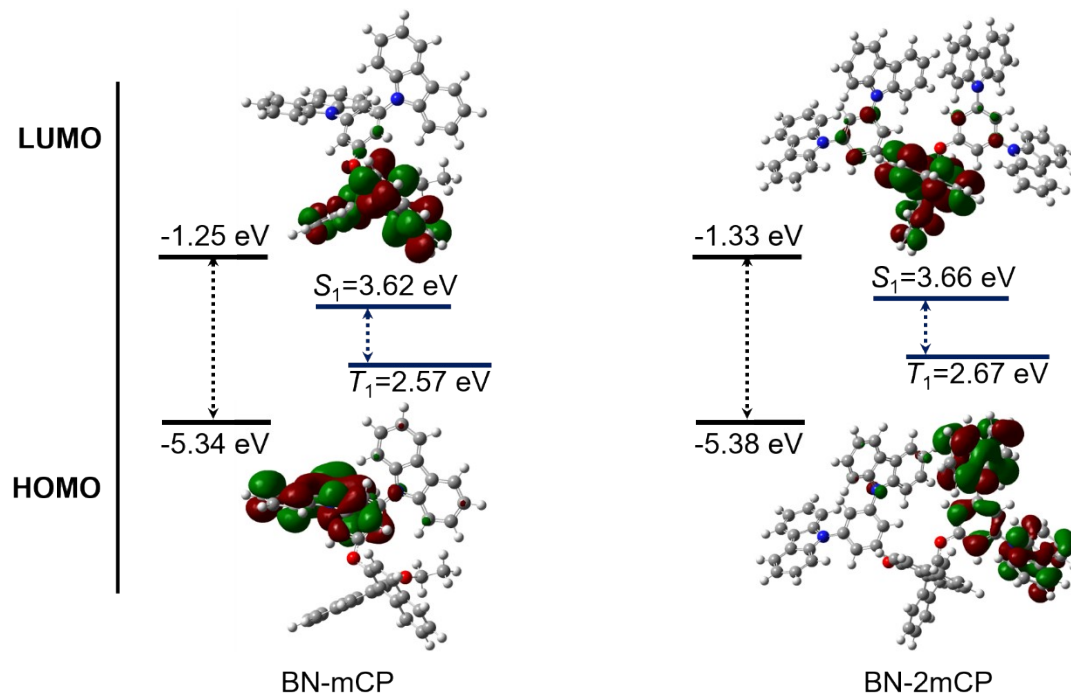

**Fig. S24** HOMO and LUMO orbital distributions, calculated band gaps and  $S_1$  and  $T_1$  energy levels for compounds based on DFT at the B3LYP functional and 6-31G(d) basis set.

## 5 Ultraviolet Photoelectron Spectroscopy

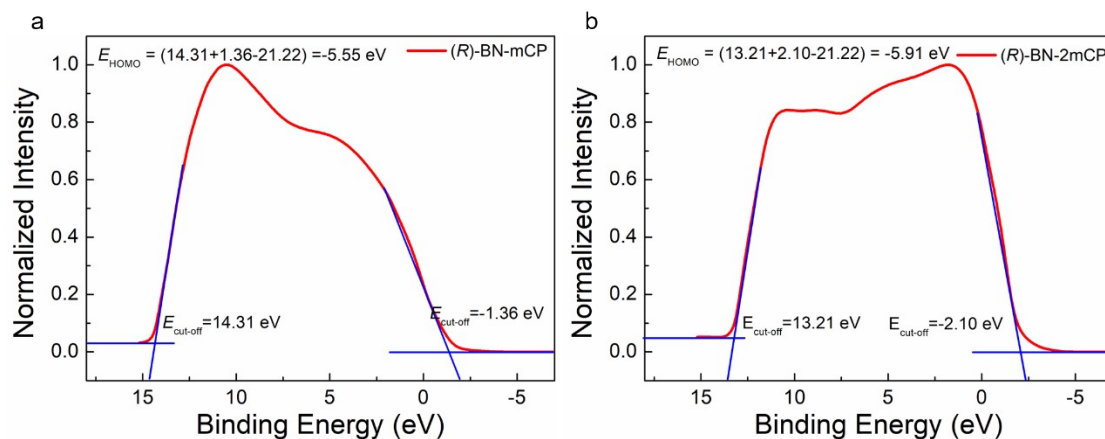

Fig. S25 Ultraviolet photoelectron spectra UPS spectra of (a) (R)-BN-mCP, (b) (R)-BN-2mCP.

## 6 Electrochemical properties

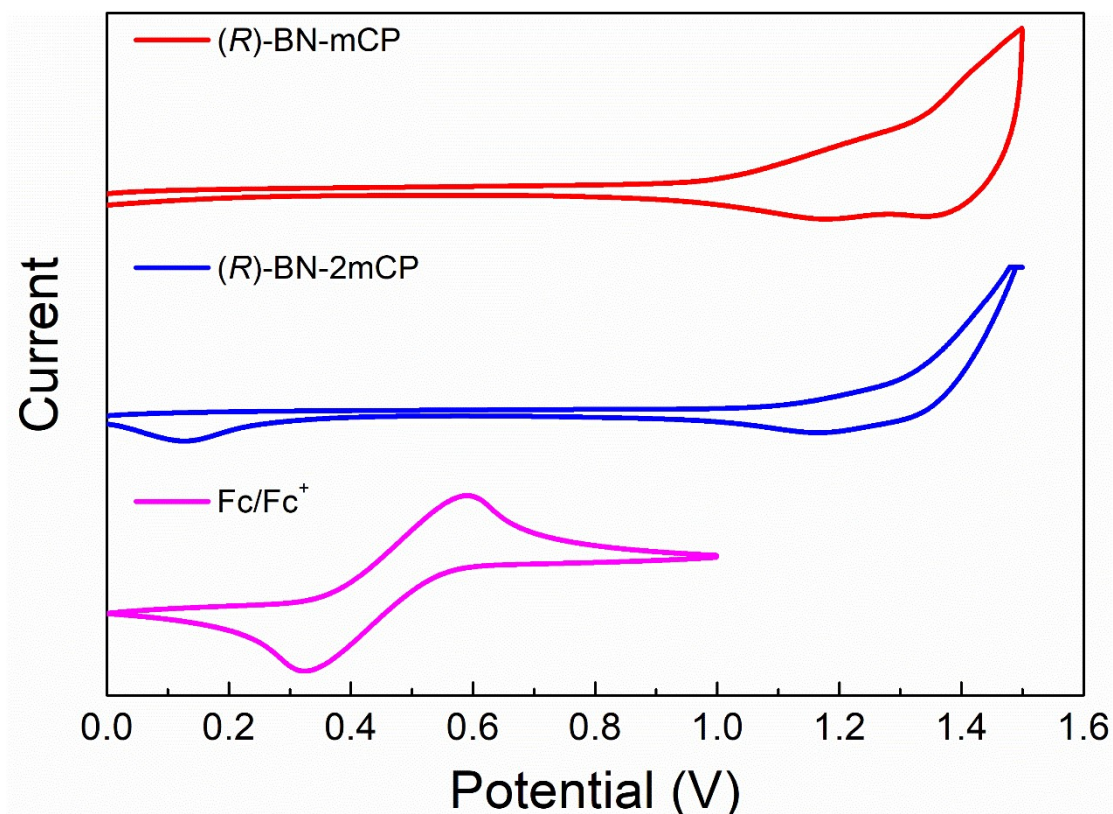

Fig. S26 CV curves of the (R)-BN-mCP and (R)-BN-2mCP in  $\text{CH}_3\text{CN}$  solution

The redox property of the (R)-BN-mCP and (R)-BN-2mCP was investigated by cyclic voltammetry (CV) measurement in acetonitrile solution. As shown in **Figure S26**, only irreversible oxidation ( $E_{\text{ox}}$ ) waves were detected for the hosts in the range of 0~1.5 V. According to the oxidation onset, the  $E_{\text{ox}}$  are evaluated to be 1.22 for (R)-BN-mCP and 1.29 for (R)-BN-2mCP relative to ferrocenium/ferrocene ( $\text{Fc}/\text{Fc}^+$ ,  $E_{\text{Fc}/\text{Fc}^+} = 0.48$  V). According to the empirical formulae of  $E_{\text{HOMO}}$

$= -(E_{\text{ox}} - E_{\text{Fc/Fc}^+} + 4.8) \text{ eV}$  and  $E_{\text{LUMO}} = -(E_{\text{HOMO}} + E_{\text{g}}) \text{ eV}$ , the HOMO/LUMO energy level of (R)-BN-mCP and (R)-BN-2mCP are calculated to be  $-5.54/-1.89$  and  $-5.61/-1.85 \text{ eV}$ .

## 7 Photophysical properties

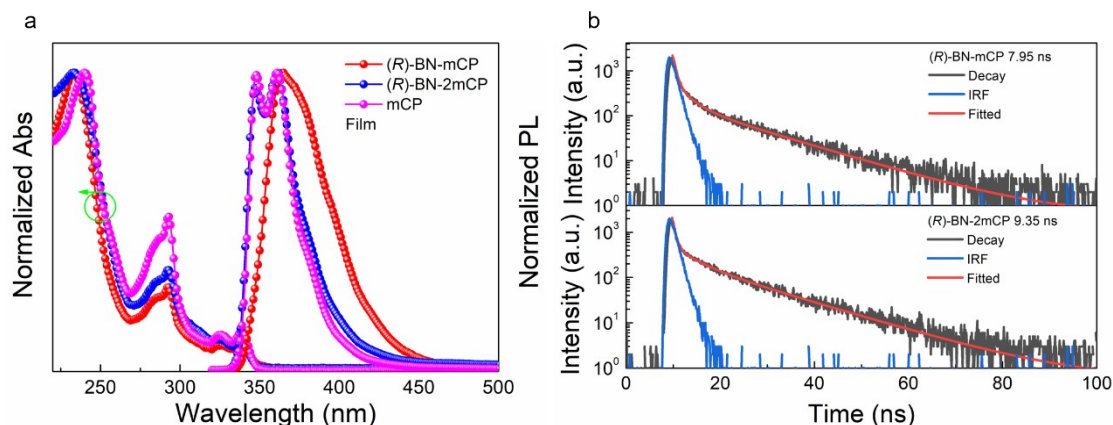

**Fig. S27** (a) UV-vis spectra and PL spectra ( $\lambda_{\text{ex}}=300 \text{ nm}$ ) in doped PMMA film (10%) at room temperature; (b) fluorescence lifetime in doped PMMA film (10%) at room temperature.

**Table S1** Photophysical data of the three compounds.

| Com<br>poun<br>ds       | $^a\lambda_{\text{abs}}$ | $^a\lambda_{\text{em}}$ | $^b\lambda_{\text{abs}}$ | $^b\lambda_{\text{em}}$ | $^cS_1$ | $^cT_1$ | $^{d,e}E_{\text{H}}$   | $^{d,e}E_{\text{LU}}$  | $^fT_{\text{d}}$ | $^gT_{\text{g}}$ | $E_{\text{g}}^{\text{opt}}$ |
|-------------------------|--------------------------|-------------------------|--------------------------|-------------------------|---------|---------|------------------------|------------------------|------------------|------------------|-----------------------------|
|                         | /nm                      | /nm                     | /nm                      | /nm                     | /eV     | /eV     | OMO<br>/eV             | MO<br>/eV              | /°C              | /°C              | /eV                         |
| (R)-<br>BN-<br>mCP      | 293,3<br>26,33<br>9      | 364                     | 233,2<br>93,32<br>6,339  | 365                     | 3.72    | 2.61    | $-5.55^d$<br>$-5.54^e$ | $-1.90^d$<br>$-1.89^e$ | 359              | 107              | 3.65                        |
| (R)-<br>BN-<br>2mC<br>P | 282,2<br>93,32<br>6,339  | 345,3<br>60             | 233,2<br>93,32<br>6,339  | 348,3<br>61             | 3.76    | 2.67    | $-5.91^d$<br>$-5.61^e$ | $-2.15^d$<br>$-1.85^e$ | 524              | 177              | 3.76                        |
| mCP                     | 282,2<br>93,32<br>6,339  | 345,3<br>60             | 240,2<br>93,32<br>6,339  | 348,3<br>61             | 3.72    | 3.16    | $-5.90$                | $-2.40$                |                  |                  |                             |

a: Measured in  $10^{-5}\text{M}$  toluene at room temperature ( $\lambda_{\text{ex}}=300 \text{ nm}$ ); b: 10 wt% in PMMA at room temperature ( $\lambda_{\text{ex}}=300 \text{ nm}$ ); c: calculated for the onsets of the low-temperature (77 K) fluorescence and phosphorescence ( $\lambda_{\text{ex}}=300 \text{ nm}$ ); d: collected from UPS; e: collected from CV measurement f: in  $\text{N}_2$  with the heating rate of  $20^\circ\text{C min}^{-1}$ . g: in  $\text{N}_2$  with the heating rate of  $10^\circ\text{C min}^{-1}$ .



## 8 Chiroptical properties

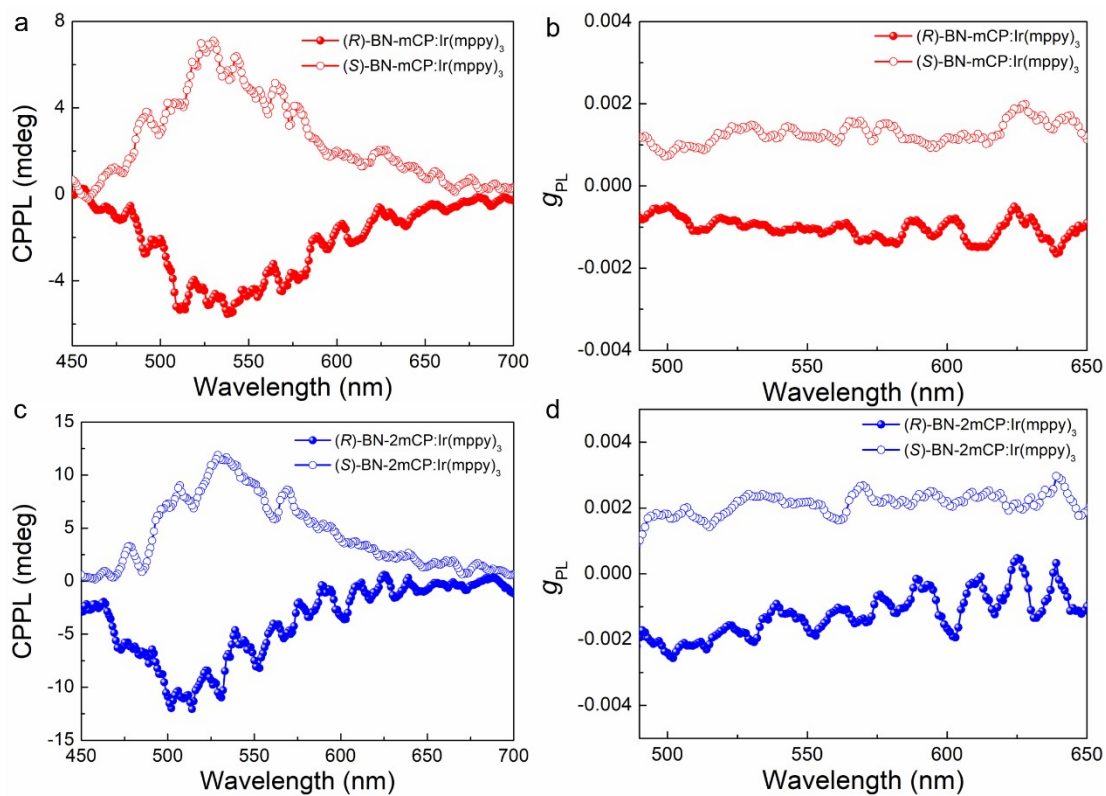

**Fig. S28** (a) CPL spectra of the  $\text{Ir}(\text{mppy})_3$  doped in  $(R/S)$ -BN-mCP host; (b)  $g_{PL}$  spectra of the  $\text{Ir}(\text{mppy})_3$  doped in  $(R/S)$ -BN-mCP host; (c) CPL spectra of the  $\text{Ir}(\text{mppy})_3$  doped in  $(R/S)$ -BN-2mCP host; (d)  $g_{PL}$  spectra of the  $\text{Ir}(\text{mppy})_3$  doped in  $(R/S)$ -BN-2mCP host.

## 9 CP-OLEDs performances



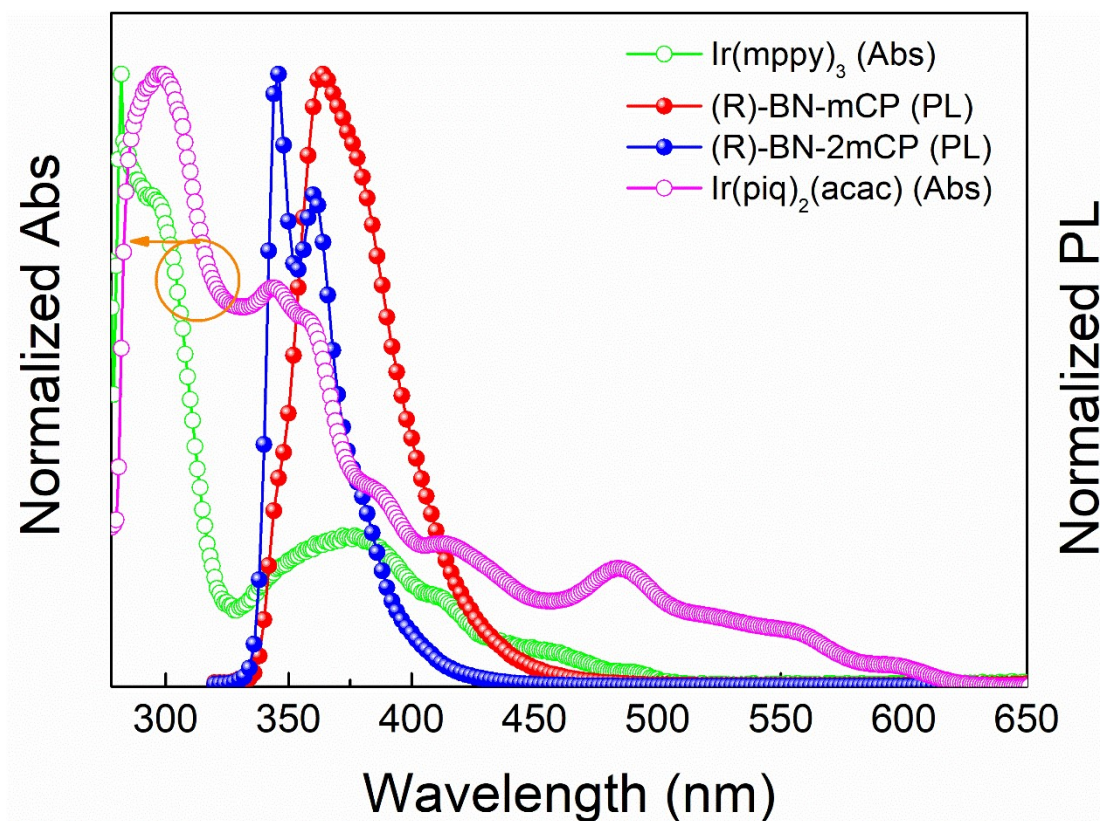

**Fig. S29** UV-vis spectra (guest) and PL spectra (host) ( $\lambda_{\text{ex}}=300$  nm) measured in toluene solution ( $10^{-5}$  M).

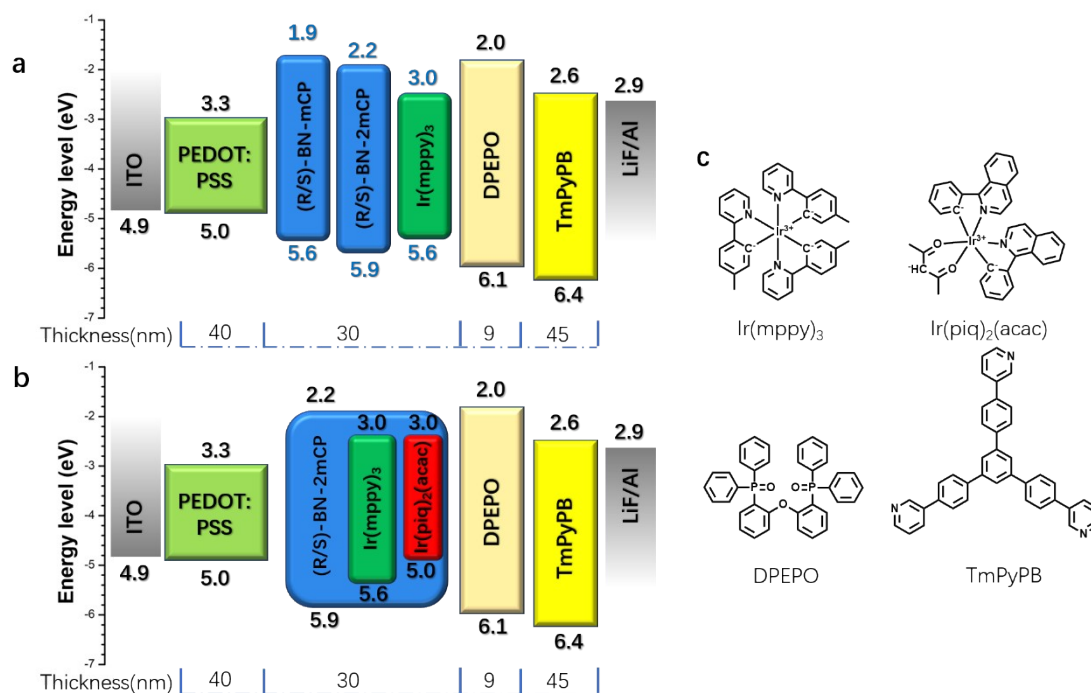

**Fig. S30** Devices structures of (a) Green OLEDs, (b) two emitters OLEDs and (c) the molecular

structures in the devices.

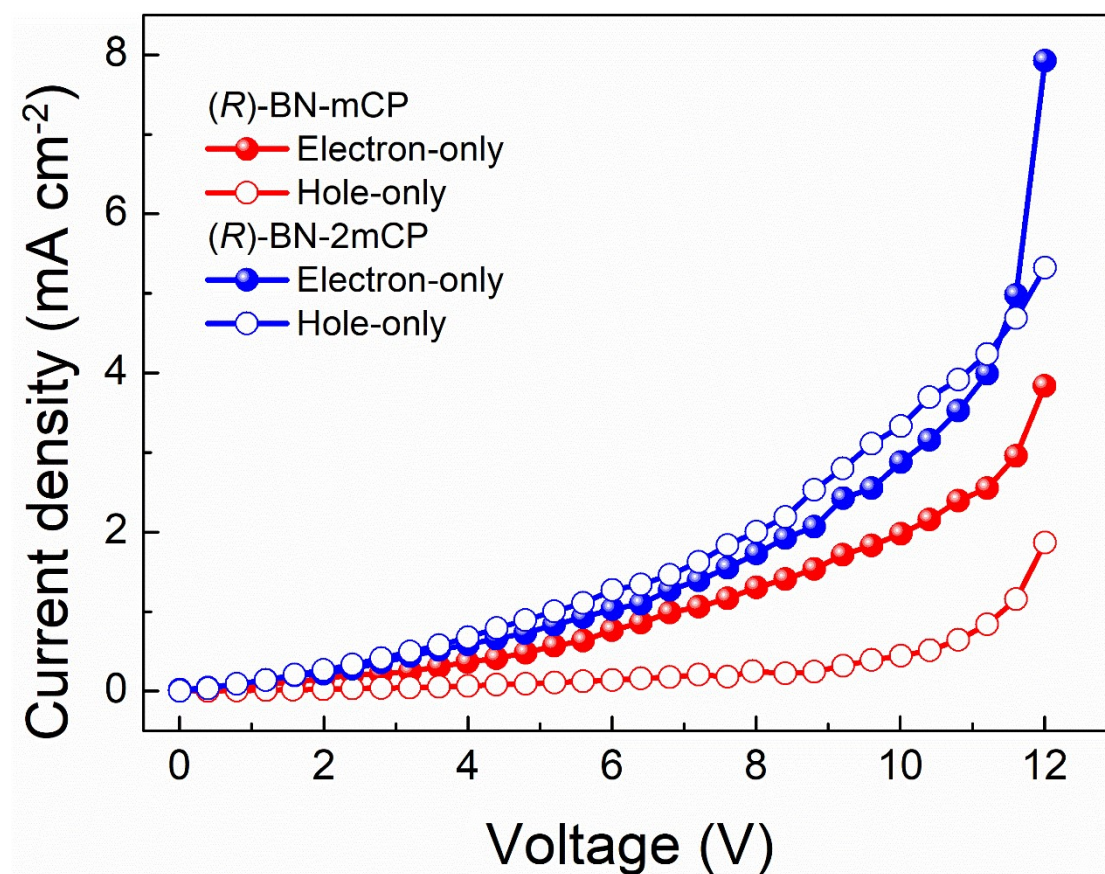

Fig. S31 The mobility of chiral hosts of (R)-BN-mCP and (R)-BN-2mCP.

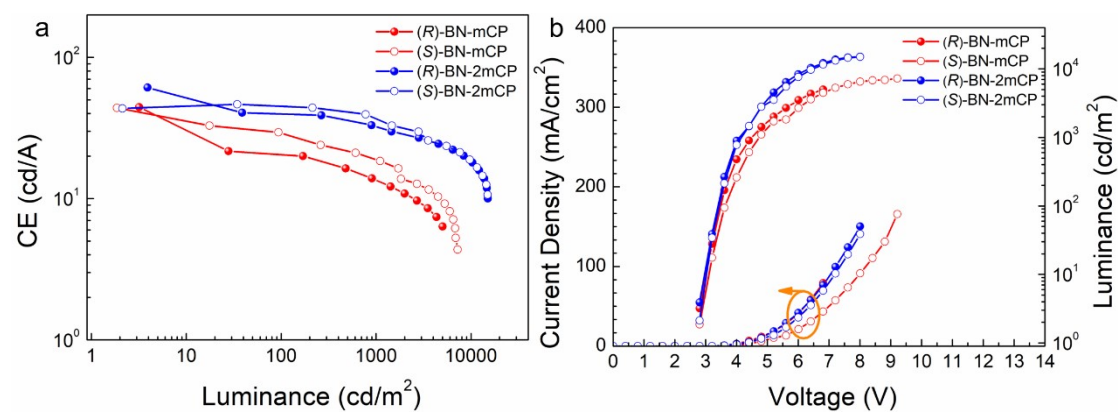

Fig. S32 EL properties of the green CP-OLEDs devices: a) CE-luminance curves; b) current density-voltage-luminance curves

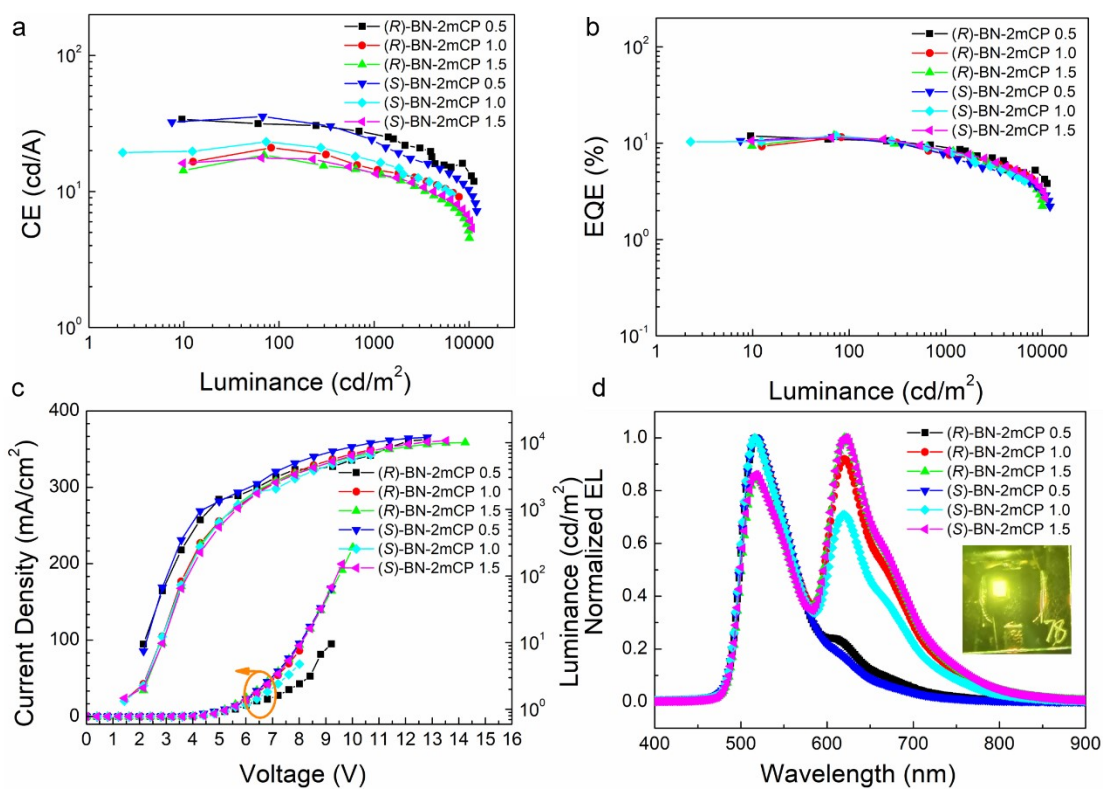

**Fig. S33** EL properties of based on *(R/S)*-BN-2mCP: Ir(mppy)<sub>3</sub>:Ir(piq)<sub>2</sub>(acac) : a) CE-luminance curves; b) EQE-luminance curves; c) current density-voltage-luminance curves; d) normalized EL spectra (Inset: emission pictures of the devices).

**Table S2** EL data for the green CP-OLEDs devices

| Device                            |       | $V_{ON}$ | $L_{max}$          | $CE_{max}$         | $EQE_{max}$ | $CIE$       | $Peak$ | $g_{EL}$          |
|-----------------------------------|-------|----------|--------------------|--------------------|-------------|-------------|--------|-------------------|
| EML : host: Ir(mppy) <sub>3</sub> |       | V        | cd m <sup>-2</sup> | cd A <sup>-1</sup> | %           | (x, y)      | nm     | ×10 <sup>-3</sup> |
| (R)-BN-mCP                        | 80:20 | 2.8      | 5022               | 44.37              | 12.7        | (0.30,0.62) | 518    | □1.7              |
| (S)-BN-mCP                        | 80:20 | 2.8      | 7230               | 43.85              | 12.4        | (0.30,0.62) | 518    | □1.3              |
| (R)-BN-2mCP                       | 80:20 | 2.8      | 15070              | 61.03              | 17.1        | (0.30,0.63) | 518    | □1.3              |
| (S)-BN-2mCP                       | 80:20 | 2.8      | 15000              | 46.45              | 13.0        | (0.30,0.62) | 518    | □2.1              |

**Table S3** EL data for the CP-OLEDs devices

| Device                                                      |             | $V_{ON}$ | $L_{max}$          | $CE_{max}$         | $EQE_{max}$ | $CIE$       | $g_{EL}$          |
|-------------------------------------------------------------|-------------|----------|--------------------|--------------------|-------------|-------------|-------------------|
| host:<br>Ir(mppy) <sub>3</sub> :Ir(piq) <sub>2</sub> (acac) |             | V        | cd m <sup>-2</sup> | cd A <sup>-1</sup> | %           | (x, y)      | ×10 <sup>-3</sup> |
| (R)-BN-<br>2mCP                                             | 84.5:15:0.5 | 3.2      | 11260              | 33.93              | 11.9        | (0.32,0.60) |                   |
|                                                             | 84:15:1.0   | 3.2      | 7849               | 20.96              | 11.6        | (0.43,0.52) |                   |
|                                                             | 83.5:15:1.5 | 3.2      | 10060              | 18.56              | 12.1        | (0.45,0.50) | □1.1              |
| (S)-BN-<br>2mCP                                             | 84.5:15:0.5 | 3.2      | 12040              | 35.57              | 11.6        | (0.31,0.61) |                   |
|                                                             | 84:15:1.0   | 3.2      | 6577               | 23.18              | 12.0        | (0.40,0.54) |                   |
|                                                             | 83.5:15:1.5 | 3.2      | 10740              | 17.66              | 11.4        | (0.43,0.51) |                   |
